# Supplementary material for: Natural variation in flavonol accumulation in Arabidopsis is determined by the flavonol glucosyltransferase BGLU6
Source: PubMed Central journal article supplement (PMC4762388; doi:10.1093/jxb/erv546), 2015-12-29
Supplement: supp_erv546_supplementary_tables_S1_S7_figures_S1_S5.pdf [file supp_erv546_supplementary_tables_S1_S7_figures_S1_S5.pdf]

## Supplementary Data

### Natural variation in flavonol accumulation in *Arabidopsis* is determined by the flavonol glucosyltransferase *BGLU6*

Hirofumi Ishihara, Takayuki Tohge, Prisca Viehöver, Alisdair R. Fernie, Bernd Weisshaar, Ralf Stracke

**Table S1:** Listing of SNPs and deletions (Del) in the At1g60270 gene of *A. thaliana* natural accessions from the Nordborg collection, correlating with the presence or the absence of F3GG7R accumulation.

**Table S2:** PCR-based markers. PCR primer sets and restriction enzymes used for genotyping of the RILs are listed.

**Table S3:** LC-MS derived quantitative flavonol profiles of *A. thaliana* accessions, *BGLU6* T-DNA insertion lines and *BGLU6* complementation lines.

**Table S4:** F3GG7R chemotype of Lister and Dean *Ler* x Col RILs.

**Table S5:** List of annotated genes on Col-0 chromosome 1 between the flanking markers H139 and H238.

**Table S6:** Sequence polymorphisms and their linkage disequilibrium (LD) in *BGLU6/At1g60270*.

**Table S7:** List of 100 genes showing strongest co-expression with *BGLU6*.

**Figure S1:** Fine-mapping of the F3GG7R locus on chromosome 1.

**Figure S2:** *BGLU6* promoter, alignment and putative MYB binding sites.

**Figure S3:** Correlation analyses of F3GG7R-production with environmental factors at accession collection places.

**Figure S4:** Multiple alignment of GH1-type flavonoid glucosyltransferases.

**Figure S5:** Co-transfection analysis of target gene specificities in *A. thaliana* At7 protoplasts.

**Table S1: Listing of SNPs and deletions (Del) in the *At1g60270* gene of *A. thaliana* natural accessions from the Nordborg collection, correlating with the presence (green) or the absence (orange) of F3GG7R accumulation.**

The analysed data from the 1001 genomes project dated from January 2013. Positions of SNPs and Dels are given on *At1g60270* CDS and TAIR10 pseudo-chromosome 1. Reference accession is Col-0 (marked in red). \*contrary to 1001 genomes data, validated by PCR and Sanger sequencing. n.a.: not analyzed.

| accession    | NASC ID       | F3GG7R   | 1001 genomes data available | SNP 1138 (22,222,268) | Del 678 (22,223,110) | Del 395 (22,223,483) | SNP 913 (22,222,694) | SNP 168 (22,224,061) |
|--------------|---------------|----------|-----------------------------|-----------------------|----------------------|----------------------|----------------------|----------------------|
| Bil-7        | N22579        | +        | +                           | +                     | -                    | -                    | -                    | -                    |
| Bor-1        | N22590        | +        | +                           | +                     | -                    | -                    | -                    | -                    |
| C24          | N22620        | +        | +                           | + *                   | -                    | -                    | -                    | -                    |
| Est-1        | N22629        | +        | +                           | +                     | -                    | -                    | -                    | -                    |
| Fab-2        | N22576        | +        | +                           | +                     | -                    | -                    | -                    | -                    |
| Fab-4        | N22577        | +        | +                           | +                     | -                    | -                    | -                    | -                    |
| Ga-0         | N22634        | +        | +                           | +                     | -                    | -                    | -                    | -                    |
| Got-22       | N22609        | +        | +                           | +                     | -                    | -                    | -                    | -                    |
| Gu-0         | N22617        | +        | +                           | +                     | -                    | -                    | -                    | -                    |
| Kas-1        | N22638        | +        | +                           | +                     | -                    | -                    | -                    | -                    |
| Kondara      | N22651        | +        | +                           | +                     | -                    | -                    | -                    | -                    |
| Ler-1        | N22618        | +        | +                           | +                     | -                    | -                    | -                    | -                    |
| Lp2-2        | N22594        | +        | +                           | +                     | -                    | -                    | -                    | -                    |
| Lp2-6        | N22595        | +        | +                           | +                     | -                    | -                    | -                    | -                    |
| NFA-10       | N22599        | +        | +                           | +                     | -                    | -                    | -                    | -                    |
| NFA-8        | N22598        | +        | +                           | +                     | -                    | -                    | -                    | -                    |
| Nok-3        | N22643        | +        | +                           | +                     | -                    | -                    | -                    | -                    |
| Oy-0         | N22658        | +        | +                           | +                     | -                    | -                    | -                    | -                    |
| Pro-0        | N22649        | +        | +                           | +                     | -                    | -                    | -                    | -                    |
| Pu2-23       | N22593        | +        | +                           | +                     | -                    | -                    | -                    | -                    |
| Pu2-7        | N22592        | +        | +                           | +                     | -                    | -                    | -                    | -                    |
| Ra-0         | N22632        | +        | +                           | +                     | -                    | -                    | -                    | -                    |
| Ren-1        | N22610        | +        | +                           | +                     | -                    | -                    | -                    | -                    |
| RRS-7        | N22564        | +        | +                           | +                     | -                    | -                    | -                    | -                    |
| Se-0         | N22646        | +        | +                           | +                     | -                    | -                    | -                    | -                    |
| Sorbo        | N22653        | +        | +                           | +                     | -                    | -                    | -                    | -                    |
| Ts-1         | N22647        | +        | +                           | +                     | -                    | -                    | -                    | -                    |
| Ts-5         | N22648        | +        | +                           | +                     | -                    | -                    | -                    | -                    |
| Tsu-1        | N22641        | +        | +                           | +                     | -                    | -                    | -                    | -                    |
| UII2-3       | N22587        | +        | +                           | +                     | -                    | -                    | -                    | -                    |
| UII2-5       | N22586        | +        | +                           | +                     | -                    | -                    | -                    | -                    |
| Uod-7        | N22613        | +        | +                           | +                     | -                    | -                    | -                    | -                    |
| Wa-1         | N22644        | +        | +                           | +                     | -                    | -                    | -                    | -                    |
| Ws-2         | N22659        | +        | +                           | +                     | -                    | -                    | -                    | -                    |
| Sakhara      | N22652        | +        | -                           | n.a.                  | n.a.                 | n.a.                 | n.a.                 | n.a.                 |
| CS22491      | N22621        | +        | -                           | n.a.                  | n.a.                 | n.a.                 | n.a.                 | n.a.                 |
| Var2-1       | N22580        | +        | -                           | n.a.                  | n.a.                 | n.a.                 | n.a.                 | n.a.                 |
| Zdr-6        | N22589        | +        | -                           | n.a.                  | n.a.                 | n.a.                 | n.a.                 | n.a.                 |
| <b>Col-0</b> | <b>N22625</b> | <b>-</b> | <b>+</b>                    | <b>reference</b>      | <b>reference</b>     | <b>reference</b>     | <b>reference</b>     | <b>reference</b>     |
| Ag-0         | N22630        | -        | +                           | -                     | -                    | -                    | -                    | -                    |
| An-1         | N22626        | -        | +                           | -                     | -                    | -                    | -                    | -                    |
| Bay-0        | N22633        | -        | +                           | -                     | -                    | -                    | -                    | -                    |
| Br-0         | N22628        | -        | +                           | -                     | -                    | -                    | -                    | -                    |
| CIBC-17      | N22603        | -        | +                           | -                     | -                    | -                    | -                    | -                    |
| CIBC-5       | N22602        | -        | +                           | -                     | -                    | -                    | -                    | -                    |
| Ct-1         | N22639        | -        | +                           | -                     | -                    | -                    | -                    | -                    |
| Ei-2         | N22616        | -        | +                           | -                     | -                    | -                    | -                    | -                    |
| Fei-0        | N22645        | -        | +                           | -                     | -                    | -                    | -                    | -                    |
| Gy-0         | N22631        | -        | +                           | -                     | -                    | -                    | -                    | -                    |
| HR-10        | N22597        | -        | +                           | -                     | -                    | -                    | -                    | -                    |
| HR-5         | N22596        | -        | +                           | -                     | -                    | -                    | -                    | -                    |
| Kin-0        | N22654        | -        | +                           | -                     | -                    | -                    | -                    | -                    |
| Knox-18      | N22567        | -        | +                           | -                     | -                    | -                    | -                    | -                    |
| LL-0         | N22650        | -        | +                           | -                     | -                    | -                    | -                    | -                    |
| Mz-0         | N22636        | -        | +                           | -                     | -                    | -                    | -                    | -                    |
| Pna-10       | N22571        | -        | +                           | -                     | -                    | -                    | -                    | -                    |
| Pna-17       | N22570        | -        | +                           | -                     | -                    | -                    | -                    | -                    |
| Ren-11       | N22611        | -        | +                           | -                     | -                    | -                    | -                    | -                    |
| Rmx-A02      | N22568        | -        | +                           | -                     | -                    | -                    | -                    | -                    |
| Rmx-A180     | N22569        | -        | +                           | -                     | -                    | -                    | -                    | -                    |
| RRS-10       | N22565        | -        | +                           | -                     | -                    | -                    | -                    | -                    |
| Sq-8         | N22601        | -        | +                           | -                     | -                    | -                    | -                    | -                    |
| Tamm-2       | N22604        | -        | +                           | -                     | -                    | -                    | -                    | -                    |
| Ws-0         | N22623        | -        | +                           | -                     | -                    | -                    | -                    | -                    |
| Wt-5         | N22637        | -        | +                           | -                     | -                    | -                    | -                    | -                    |
| Yo-0         | N22624        | -        | +                           | -                     | -                    | -                    | -                    | -                    |
| Bor-4        | N22591        | -        | +                           | +                     | +                    | -                    | -                    | -                    |
| Se-0         | N22646        | -        | +                           | +                     | +                    | -                    | -                    | -                    |
| Uod-1        | N22612        | -        | +                           | +                     | +                    | -                    | -                    | -                    |
| Zdr-1        | N22588        | -        | +                           | +                     | +                    | -                    | -                    | -                    |
| Nd-1         | N22619        | -        | +                           | +                     | -                    | +                    | -                    | -                    |
| Cvi          | N22614        | -        | +                           | +                     | -                    | -                    | +                    | -                    |
| Van-0        | N22627        | -        | +                           | +                     | -                    | -                    | -                    | +                    |
| Bur-0        | N22656        | -        | +                           | +                     | -                    | -                    | -                    | -                    |
| Eden-2       | N22573        | -        | +                           | +                     | -                    | -                    | -                    | -                    |
| Lov-1        | N22574        | -        | +                           | +                     | -                    | -                    | -                    | -                    |
| Lov-5        | N22575        | -        | +                           | +                     | -                    | -                    | -                    | -                    |
| Mt-0         | N22642        | -        | +                           | +                     | -                    | -                    | -                    | -                    |
| Knox-10      | N22566        | -        | -                           | n.a.                  | n.a.                 | n.a.                 | n.a.                 | n.a.                 |
| Kz-1         | N22606        | -        | -                           | n.a.                  | n.a.                 | n.a.                 | n.a.                 | n.a.                 |
| Mrk-0        | N22635        | -        | -                           | n.a.                  | n.a.                 | n.a.                 | n.a.                 | n.a.                 |

**Table S2: PCR-based markers.**

PCR primer sets and restriction enzymes used for genotyping of the RILs are listed. PCR primers were designed by either comparing Col and Ler genomic sequence using TAIR Ler BLAST search or were obtained from MASC (Schmid *et al.*, 2003; Torjek *et al.*, 2003).

For CAPS marker analysis, 5 µL of amplicons, generated by standard PCR with the given primer pairs, were digested with 0.5 units of the appropriate restriction enzyme and 1x restriction enzyme buffer in a total volume of 10 µL in a 96-well PCR plate. The plate was incubated at suitable temperatures for at least 3 h. The lengths of fragments were checked with electrophoresis on a 1% (w/v) agarose gel.

For sequencing markers, amplicons were sequenced with one of the PCR primers. SNPs indicating a Ler origin are marked in grey.

**CAPS marker**

| CAPS marker | MASC ID   | primer (5'->3')                                                    | position on chr. 1 [bp] | restriction enzyme |
|-------------|-----------|--------------------------------------------------------------------|-------------------------|--------------------|
| <b>H206</b> |           | H206, ATCAACTCGTCTCTTGTGCTGCC<br>H207, GACACATCCCCACATAATCAGGAG    | 21,419,862              | <i>HinP1I</i>      |
| <b>H238</b> |           | H238, ATCCCCAGAGGCCAAGTCTAATAG<br>H239, AAAGTGACATGTCCTTATTTAACTCC | 22,184,065              | <i>EcoRI</i>       |
| <b>H127</b> |           | H127, GGCTAGAACCGAAGTCTCAGG<br>H128, ATCACCATCAAACCTTGACCCCC       | 22,263,044              | <i>HindIII</i>     |
| <b>H137</b> |           | H137, CAATTGCATATTCATTAGGTACCC<br>H138, TTGAAACTTCTCTGGAGTGAAAGG   | 22,267,814              | <i>EcoRV</i>       |
| <b>H98</b>  | MASC02574 | H98, GGGTCTGAAGCTATATCGGG<br>H99, GTTATCTGCAGAAGTTTCATCC           | 22,290,039              | <i>BmgI</i>        |
| <b>H96</b>  | MASC02080 | H96, ACAGGTACAGTATTTTATAACATTC<br>H97, ACACACTCTTTGTTCTCGAGATG     | 22,704,745              | <i>Hyp188I</i>     |
| <b>H121</b> |           | H121, ATCAATATTCGTGGACGACTAGG<br>H122, AAGCTGGAGACCGTGAACGAC       | 23,039,704              | <i>HinP1I</i>      |
| <b>H102</b> | MASC07418 | H102, TACAGGGTGCCTAGTTAAACATC<br>H103, CAAAGAAGATAATCATCACTCTCC    | 23,104,168              | <i>Acil</i>        |

**Sequencing marker**

| marker       | primer (5'->3')                                                                                                                                                                                                                 | position on chr. 1 [bp] |
|--------------|---------------------------------------------------------------------------------------------------------------------------------------------------------------------------------------------------------------------------------|-------------------------|
| <b>H309</b>  | H309, CGACACCAAGTGGCCATGAAACTCC<br>H310, TATCTGCTGCTGCAAGAACCTACC                                                                                                                                                               | 22,209,871              |
| Col-0<br>Ler | ATTGCTCAACTTCTTTCTCTCATAGGGAGTGGTCTTGGGAAAAATCTCCATCACAAAGT<br>ATTGCTCAACTTCTTTCTCTCATAGGGAGT <span style="background-color: #cccccc;">T</span> GTCTTGGGAAAAATCTCCATCACAAAGT                                                    |                         |
| <b>H139</b>  | H139, GTCAGCACCTTAGAGCATCCTC<br>H140, ATGCCGTCTACCTAACTAAATCAC                                                                                                                                                                  | 22,270,466              |
| Col-0<br>Ler | AACCAATTATCTCTTAATTAAGAGACAATTTACTTAGGTTTCATCAAATTTAAGAGACT<br>AACCAATTATCTCTTAAC <span style="background-color: #cccccc;">C</span> TAAGAGACAATTTAT <span style="background-color: #cccccc;">C</span> TAGGTTTCATCAAATTTAAGAGACT |                         |

Table S3: LC-MS derived quantitative flavonol profiles of *A. thaliana* accessions, *BGLU6* T-DNA insertion lines and *BGLU6* complementation lines.

| A. thaliana natural accessions        |              |               | Rt   | 11.88   | 12.77    | 12.47   | 13.59   | 14.05  | 13.41   | 14.71   | 13.47   | 14.74   | 14.28  | 13.57    | 14.92    | 15.31   | 15.81   | 16.73    | 17.06   | 16.07   | 17.79    | 23.75  | 20.27   | 23.17   |
|---------------------------------------|--------------|---------------|------|---------|----------|---------|---------|--------|---------|---------|---------|---------|--------|----------|----------|---------|---------|----------|---------|---------|----------|--------|---------|---------|
|                                       |              |               | m/z  | 755.4   | 739.5    | 771.4   | 755.5   | 785.3  | 755.4   | 739.5   | 625.4   | 609.5   | 579.7  | 609.6    | 593.6    | 623.5   | 593.6   | 577.4    | 607.6   | 463.3   | 447.2    | 461.2  | 447.3   | 431.2   |
|                                       |              |               | syn. | f8      | f3       |         |         |        | f8      | f3      | f26     | f21     | f25    | f6       | f2       | f14     | f5      | f1       | f30     | f16     | f18      | f28    | f24     | f17     |
| sample ID                             | accession    |               | FG   | Q3GR7R  | K3GR7R   | Q3GG7R  | K3GG7R  | I3GG7R | Q3GR7R  | K3GR7R  | Q3G7R   | K3G7R   | Q3A7R  | Q3GR7R   | K3GR7R   | I3GR7R  | Q3R7R   | K3R7R    | I3R7R   | Q3G     | K3G      | I3G    | Q3R     | K3R     |
| 141128_Ralf_01                        | N0-0         | seedlings     | AVG  | 2969105 | 2992443  | 3388910 | 5404377 | 35584  | 3056207 | 1825252 | 0       | 0       | 0      | 1156699  | 9919328  | 4487562 | 3036434 | 6585967  | 284694  | 1831514 | 490070   | 73236  | 677289  | 758429  |
| 141128_Ralf_02                        | Col-0        | seedlings     | SE   | 2296685 | 6492954  | 0       | 0       | 0      | 1760500 | 1904489 | 0       | 0       | 0      | 1302692  | 14082677 | 4729577 | 5239561 | 7632012  | 310500  | 410030  | 312672   | 48126  | 525567  | 1178999 |
| 141128_Ralf_03                        | Ler          | seedlings     | AVG  | 1950350 | 4096284  | 1994524 | 5627993 | 24648  | 684070  | 647763  | 0       | 0       | 0      | 11129835 | 10926742 | 5849896 | 4477374 | 9198917  | 246536  | 398483  | 237997   | 74765  | 373667  | 781811  |
| 141128_Ralf_04                        | Ws-2         | seedlings     | AVG  | 2947407 | 5391661  | 4112008 | 5992969 | 36196  | 2630695 | 1354465 | 0       | 0       | 0      | 11759620 | 10981041 | 5691282 | 3435753 | 6848631  | 245469  | 262708  | 118841   | 87435  | 633315  | 748255  |
| 141128_Ralf_05                        | Zdr-1        | seedlings     | AVG  | 430387  | 1843083  | 0       | 0       | 0      | 1813807 | 1329743 | 0       | 0       | 0      | 12430220 | 13628478 | 4377338 | 3849765 | 11029758 | 223561  | 386331  | 189039   | 68753  | 617854  | 1526704 |
| 141128_Ralf_06                        | Nd-1         | seedlings     | AVG  | 4075763 | 5906953  | 0       | 0       | 0      | 3587319 | 1568829 | 0       | 0       | 0      | 14087885 | 14748131 | 5124067 | 6499691 | 8885866  | 343896  | 287438  | 158404   | 101900 | 1290122 | 2396411 |
| 141128_Ralf_07                        | Ag-0         | seedlings     | AVG  | 2228292 | 2595290  | 0       | 0       | 0      | 1261176 | 494509  | 0       | 0       | 0      | 11516005 | 11091734 | 3996542 | 2014379 | 7009556  | 151625  | 114978  | 58289    | 85935  | 867006  | 1072188 |
| 141128_Ralf_08                        | Est-1        | seedlings     | AVG  | 3465592 | 6845074  | 2995657 | 6185631 | 368344 | 3083245 | 2562668 | 0       | 0       | 0      | 11989858 | 12835162 | 7131099 | 4037872 | 6786742  | 282779  | 653806  | 261039   | 96787  | 478803  | 930409  |
| 141128_Ralf_09                        | Bay-0        | seedlings     | AVG  | 2828703 | 4333490  | 0       | 0       | 0      | 2216096 | 1522260 | 0       | 0       | 0      | 14065243 | 15013224 | 5850633 | 4588478 | 11677585 | 242473  | 365565  | 169037   | 63133  | 560689  | 1459125 |
| 141128_Ralf_10                        | Ws-0         | seedlings     | AVG  | 2327955 | 7052770  | 0       | 0       | 0      | 2869948 | 3624659 | 0       | 0       | 0      | 14171132 | 15931463 | 5481969 | 3637838 | 10614542 | 161317  | 240093  | 425537   | 77498  | 789440  | 2429822 |
| 141128_Ralf_11                        | Cvi          | seedlings     | AVG  | 1707863 | 4612484  | 0       | 0       | 0      | 152970  | 165952  | 0       | 0       | 0      | 12443385 | 15711282 | 5502572 | 4188319 | 12310196 | 254989  | 948135  | 796612   | 62967  | 411306  | 1617524 |
| 141128_Ralf_12                        | Ei-2         | seedlings     | AVG  | 3527772 | 5101605  | 0       | 0       | 0      | 2629815 | 1601461 | 0       | 0       | 0      | 13169820 | 13038199 | 5199586 | 3353349 | 10130624 | 149918  | 433795  | 135168   | 63081  | 570295  | 1668157 |
| 141128_Ralf_14                        | Ws-4         | seedlings     | AVG  | 2074348 | 4296949  | 2628033 | 4489576 | 32175  | 1540878 | 790028  | 0       | 0       | 0      | 10036366 | 8866623  | 4457466 | 1849362 | 6399886  | 143239  | 227319  | 131909   | 93192  | 605205  | 739801  |
| <b>bglu6-1 T-DNA insertion mutant</b> |              |               | Rt   | 11.88   | 12.77    | 12.47   | 13.59   | 14.05  | 13.41   | 14.71   | 13.47   | 14.74   | 14.28  | 13.57    | 14.92    | 15.31   | 15.81   | 16.73    | 17.06   | 16.07   | 17.79    | 23.75  | 20.27   | 23.17   |
|                                       |              |               | m/z  | 755.4   | 739.5    | 771.4   | 755.5   | 785.3  | 755.4   | 739.5   | 625.4   | 609.5   | 579.7  | 609.6    | 593.6    | 623.5   | 593.6   | 577.4    | 607.6   | 463.3   | 447.2    | 461.2  | 447.3   | 431.2   |
|                                       |              |               | syn. | f8      | f3       |         |         |        | f8      | f3      | f26     | f21     | f25    | f6       | f2       | f14     | f5      | f1       | f30     | f16     | f18      | f28    | f24     | f17     |
| sample IDs                            | genotype     | organ         | FG   | Q3GR7R  | K3GR7R   | Q3GG7R  | K3GG7R  | I3GG7R | Q3GR7R  | K3GR7R  | Q3G7R   | K3G7R   | Q3A7R  | Q3GR7R   | K3GR7R   | I3GR7R  | Q3R7R   | K3R7R    | I3R7R   | Q3G     | K3G      | I3G    | Q3R     | K3R     |
| 141128_Ralf_15-17                     | bglu6-1      | seedlings     | AVG  | 1714756 | 3974325  | 0       | 0       | 0      | 1227615 | 678879  | 0       | 0       | 0      | 9365214  | 10286735 | 3890469 | 1712815 | 6505512  | 120210  | 193763  | 109483   | 349258 | 1735913 | 3228211 |
|                                       |              | SE            | SE   | 103827  | 347966   | 0       | 0       | 0      | 115672  | 76941   | 0       | 0       | 0      | 281169   | 214998   | 206463  | 87519   | 345210   | 4275    | 16515   | 23260    | 18228  | 77917   | 204017  |
| 141128_Ralf_18-20                     | bglu6-1      | inflorescence | AVG  | 114804  | 17822600 | 0       | 0       | 0      | 0       | 0       | 2911386 | 7309166 | 79286  | 620003   | 14767414 | 2735272 | 2205956 | 2949496  | 1855726 | 21165   | 93085    | 39923  | 28108   | 656777  |
|                                       |              | SE            | SE   | 13227   | 407125   | 0       | 0       | 0      | 0       | 0       | 241125  | 132286  | 9810   | 74633    | 537393   | 142098  | 121559  | 390350   | 101318  | 1241    | 2357     | 3124   | 1679    | 59081   |
| 141128_Ralf_21-23                     | bglu6-1      | siliqua       | AVG  | 23307   | 3761856  | 0       | 0       | 0      | 0       | 0       | 0       | 0       | 0      | 309797   | 5926734  | 166813  | 669569  | 12984005 | 162744  | 371258  | 12255619 | 12693  | 47833   | 170991  |
|                                       |              | SE            | SE   | 2187    | 269072   | 0       | 0       | 0      | 0       | 0       | 0       | 0       | 0      | 58437    | 383109   | 15562   | 63803   | 530269   | 8961    | 19327   | 267580   | 548    | 14599   | 27794   |
| 141128_Ralf_24-26                     | bglu6-1      | stem          | AVG  | 10441   | 4160927  | 0       | 0       | 0      | 0       | 0       | 0       | 0       | 0      | 17834    | 3648052  | 122728  | 132896  | 14103759 | 73369   | 0       | 0        | 0      | 0       | 0       |
|                                       |              | SE            | SE   | 637     | 81213    | 0       | 0       | 0      | 0       | 0       | 0       | 0       | 0      | 1003     | 184716   | 6368    | 8121    | 93575    | 4435    | 0       | 0        | 0      | 0       | 0       |
| 141128_Ralf_27-29                     | bglu6-1      | rosette leaf  | AVG  | 3312    | 756248   | 0       | 0       | 0      | 0       | 0       | 0       | 0       | 0      | 7176     | 440584   | 19803   | 22561   | 2086707  | 11172   | 0       | 0        | 0      | 0       | 0       |
|                                       |              | SE            | SE   | 1307    | 184943   | 0       | 0       | 0      | 0       | 0       | 0       | 0       | 0      | 1649     | 104829   | 7896    | 4043    | 371083   | 2821    | 0       | 0        | 0      | 0       | 0       |
| 141128_Ralf_30-32                     | Ws-4 wt      | seedlings     | AVG  | 1709150 | 4169707  | 2379899 | 4983948 | 359615 | 1352760 | 844724  | 0       | 0       | 0      | 7970962  | 7988793  | 3664512 | 1729967 | 7213307  | 145586  | 169312  | 104193   | 343680 | 1576973 | 1969069 |
|                                       |              | SE            | SE   | 221249  | 501488   | 294386  | 411351  | 48692  | 246140  | 150842  | 0       | 0       | 0      | 801143   | 771967   | 441504  | 294887  | 436726   | 23381   | 21972   | 16576    | 9946   | 70431   | 118895  |
| 141128_Ralf_33-35                     | Ws-4 wt      | inflorescence | AVG  | 386737  | 18239919 | 0       | 746951  | 0      | 0       | 0       | 4724940 | 9150766 | 186648 | 1660984  | 15834654 | 5993437 | 4402441 | 31590160 | 4127675 | 42494   | 149170   | 89530  | 64986   | 1356880 |
|                                       |              | SE            | SE   | 21922   | 989835   | 0       | 43306   | 0      | 0       | 0       | 308150  | 382193  | 3286   | 66163    | 237654   | 294761  | 99586   | 329707   | 240320  | 4299    | 2602     | 8925   | 4036    | 132740  |
| 141128_Ralf_36-38                     | Ws-4 wt      | siliqua       | AVG  | 29554   | 4787282  | 0       | 156974  | 0      | 0       | 0       | 0       | 0       | 0      | 210855   | 6331432  | 273799  | 584205  | 13927991 | 241470  | 433332  | 14323172 | 9325   | 25687   | 150573  |
|                                       |              | SE            | SE   | 1233    | 214835   | 0       | 3693    | 0      | 0       | 0       | 0       | 0       | 0      | 34284    | 178331   | 5393    | 32861   | 325426   | 5655    | 19726   | 326219   | 620    | 6268    | 11824   |
| 141128_Ralf_39-41                     | Ws-4 wt      | stem          | AVG  | 14258   | 5061639  | 0       | 1249795 | 49318  | 0       | 0       | 0       | 0       | 0      | 27733    | 3650159  | 136826  | 116967  | 15490634 | 84642   | 0       | 0        | 0      | 0       | 0       |
|                                       |              | SE            | SE   | 470     | 157404   | 0       | 56966   | 1186   | 0       | 0       | 0       | 0       | 0      | 1575     | 287254   | 6975    | 11405   | 251840   | 2715    | 0       | 0        | 0      | 0       | 0       |
| 141128_Ralf_42-44                     | Ws-4 wt      | rosette leaf  | AVG  | 1487    | 759598   | 0       | 326994  | 0      | 0       | 0       | 0       | 0       | 0      | 8438     | 168912   | 16283   | 11120   | 2287370  | 5055    | 0       | 0        | 0      | 0       | 0       |
|                                       |              | SE            | SE   | 329     | 183018   | 0       | 92964   | 0      | 0       | 0       | 0       | 0       | 0      | 1514     | 25651    | 6189    | 1277    | 562882   | 1897    | 0       | 0        | 0      | 0       | 0       |
| <b>BGLU6 complementation lines</b>    |              |               | Rt   | 11.88   | 12.77    | 12.47   | 13.59   | 14.05  | 13.41   | 14.71   | 13.47   | 14.74   | 14.28  | 13.57    | 14.92    | 15.31   | 15.81   | 16.73    | 17.06   | 16.07   | 17.79    | 23.75  | 20.27   | 23.17   |
|                                       |              |               | m/z  | 755.4   | 739.5    | 771.4   | 755.5   | 785.3  | 755.4   | 739.5   | 625.4   | 609.5   | 579.7  | 609.6    | 593.6    | 623.5   | 593.6   | 577.4    | 607.6   | 463.3   | 447.2    | 461.2  | 447.3   | 431.2   |
|                                       |              |               | syn. | f8      | f3       |         |         |        | f8      | f3      | f26     | f21     | f25    | f6       | f2       | f14     | f5      | f1       | f30     | f16     | f18      | f28    | f24     | f17     |
| sample IDs                            | genotype     |               | FG   | Q3GR7R  | K3GR7R   | Q3GG7R  | K3GG7R  | I3GG7R | Q3GR7R  | K3GR7R  | Q3G7R   | K3G7R   | Q3A7R  | Q3GR7R   | K3GR7R   | I3GR7R  | Q3R7R   | K3R7R    | I3R7R   | Q3G     | K3G      | I3G    | Q3R     | K3R     |
| 141128_hiro_01,13,25                  | Col-0        | rosette leaf  | AVG  | 614879  | 6109263  | 0       | 0       | 0      | 0       | 0       | 0       | 0       | 0      | 650235   | 6971349  | 125241  | 1464946 | 8984197  | 47210   | 0       | 0        | 0      | 0       | 0       |
|                                       |              | SE            | SE   | 84815   | 735146   | 0       | 0       | 0      | 0       | 0       | 0       | 0       | 0      | 102398   | 393350   | 47278   | 132956  | 1018907  | 23571   | 0       | 0        | 0      | 0       | 0       |
| 141128_hiro_02,14,26                  | BGLU6 comp 1 | rosette leaf  | AVG  | 472730  | 5134077  | 413911  | 4462978 | 45280  | 0       | 0       | 0       | 0       | 0      | 318794   | 1444745  | 68336   | 1198203 | 6728269  | 29079   | 0       | 0        | 0      | 0       | 0       |

**Table S4: F3GG7R chemotype of Lister and Dean Ler x Col RILs.**

F3GG7R chemotypes: Col-0 (C), Ler (L) and no data (n.d.)

| <i>NASC ID</i> | <i>Lister and Dean ID</i> | <i>F3GG7R</i> | <i>NASC ID</i> | <i>Lister and Dean ID</i> | <i>F3GG7R</i> |
|----------------|---------------------------|---------------|----------------|---------------------------|---------------|
| N1900          | CL4                       | C             | N1950          | CL209                     | n.d.          |
| N1901          | CL5                       | C             | N1951          | CL217                     | L             |
| N1902          | CL7                       | n.d.          | N1952          | CL214                     | C             |
| N1903          | CL13                      | C             | N1953          | CL231                     | C             |
| N1904          | CL14                      | C             | N1954          | CL232                     | C             |
| N1905          | CL17                      | L             | N1955          | CL235                     | C             |
| N1906          | CL19B                     | L             | N1956          | CL237                     | L             |
| N1907          | CL25                      | L             | N1957          | CL238                     | C             |
| N1908          | CL29                      | C             | N1958          | CL240                     | C             |
| N1909          | CL30                      | C             | N1959          | CL242                     | C             |
| N1910          | CL32                      | L             | N1960          | CL245                     | C             |
| N1911          | CL33                      | C             | N1961          | CL253                     | C             |
| N1912          | CL34                      | C             | N1962          | CL257                     | L             |
| N1913          | CL25                      | C             | N1963          | CL263                     | C             |
| N1914          | CL36                      | C             | N1964          | CL264                     | L             |
| N1915          | CL37                      | C             | N1965          | CL266                     | C             |
| N1916          | CL46                      | C             | N1966          | CL267                     | L             |
| N1917          | CL52                      | L             | N1967          | CL279                     | C             |
| N1918          | CL54                      | C             | N1968          | CL283                     | C             |
| N1919          | CL59                      | L             | N1969          | CL284                     | L             |
| N1920          | CL62                      | n.d.          | N1970          | CL288                     | C             |
| N1921          | CL67                      | C             | N1971          | CL295                     | C             |
| N1922          | CL68                      | L             | N1972          | CL296                     | L             |
| N1923          | CL71                      | L             | N1973          | CL297                     | C             |
| N1924          | CL79                      | C             | N1974          | CL302                     | C             |
| N1925          | CL84                      | C             | N1975          | CL303                     | L             |
| N1926          | CL90                      | C             | N1976          | CL311                     | C             |
| N1927          | CL107                     | C             | N1977          | CL321                     | C             |
| N1928          | CL113                     | C             | N1978          | CL332                     | C             |
| N1929          | CL115                     | L             | N1979          | CL342                     | C             |
| N1930          | CL123                     | C             | N1980          | CL345                     | C             |
| N1931          | CL125                     | L             | N1981          | CL349                     | n.d.          |
| N1932          | CL131                     | L             | N1982          | CL350                     | L             |
| N1933          | CL160                     | C             | N1983          | CL351                     | C             |
| N1934          | CL161                     | C             | N1984          | CL356                     | L             |
| N1935          | CL166                     | C             | N1985          | CL358                     | C             |
| N1936          | CL167                     | C             | N1986          | CL359                     | L             |
| N1937          | CL173                     | L             | N1987          | CL363                     | C             |
| N1938          | CL175                     | L             | N1988          | CL367                     | C             |
| N1939          | CL177                     | C             | N1989          | CL370                     | C             |
| N1940          | CL179                     | C             | N1990          | CL377                     | C             |
| N1941          | CL180                     | C             | N1991          | CL378                     | C             |
| N1942          | CL181                     | L             | N1992          | CL386                     | C             |
| N1943          | CL182                     | C             | N1993          | CL390                     | C             |
| N1944          | CL188                     | C             | N1994          | CL394                     | C             |
| N1945          | CL190                     | L             | N1995          | CL395                     | L             |
| N1946          | CL191                     | L             | N1996          | CL397                     | L             |
| N1947          | CL193                     | C             | N1997          | CL398                     | n.d.          |
| N1948          | CL194                     | L             | N1998          | CL400                     | L             |
| N1949          | CL199                     | C             | N1999          | CL259                     | L             |
|                |                           |               | N4686          | CL53                      | n.d.          |

**Table S5: List of annotated genes on Col-0 chromosome 1 between the flanking markers H139 and H238.**

The descriptions of the annotated sequences were from the Arabidopsis genome annotation (TAIR10).

| <i>gene ID</i>   | <i>TAIR10 annotation description</i>                                                                                                                                                                                                                                                 |
|------------------|--------------------------------------------------------------------------------------------------------------------------------------------------------------------------------------------------------------------------------------------------------------------------------------|
| <i>At1g60140</i> | <i>TPS10 (TREHALOSE PHOSPHATE SYNTHASE 10)</i> encodes an enzyme putatively involved in trehalose biosynthesis. The protein has a trehalose synthase (TPS)-like domain that may or may not be active as well as a trehalose phosphatase (TPP)-like domain                            |
| <i>At1g60150</i> | transposable element gene; pseudogene, similar to putative AP endonuclease/reverse transcriptase                                                                                                                                                                                     |
| <i>At1g60160</i> | potassium transporter family protein, similar to potassium transporter HAK2p                                                                                                                                                                                                         |
| <i>At1g60170</i> | embryo defective 1220 ( <i>emb1220</i> ); contains Pre-mRNA processing ribonucleoprotein, snoRNA-binding domain                                                                                                                                                                      |
| <i>At1g60180</i> | pseudogene of F-box family protein                                                                                                                                                                                                                                                   |
| <i>At1g60190</i> | PUB19, a plant U-box armadillo repeat protein. Involved in salt inhibition of germination together with PUB18.                                                                                                                                                                       |
| <i>At1g60200</i> | splicing factor PWI domain-containing protein / RNA recognition motif (RRM)-containing protein                                                                                                                                                                                       |
| <i>At1g60220</i> | ULP1D, encodes a deSUMOylating enzyme. In vitro it has both peptidase activity and isopeptidase activity: it can cleave C-terminal residues from SUMO to activate it for attachment to a target protein and it can also act on the isopeptide bond between SUMO and another protein. |
| <i>At1g60230</i> | radical SHOOT APICAL MERISTEM (SAM) domaincontaining protein                                                                                                                                                                                                                         |
| <i>At1g60240</i> | NAC (No Apical Meristem) domain transcriptional regulator superfamily protein                                                                                                                                                                                                        |
| <i>At1g60250</i> | zinc finger (B-box type) family protein                                                                                                                                                                                                                                              |
| <i>At1g60260</i> | glycosyl hydrolase family 1 protein, <i>beta glucosidase 5 (BGLU5)</i>                                                                                                                                                                                                               |
| <i>At1g60270</i> | glycosyl hydrolase family 1 protein, <i>beta glucosidase 6 (BGLU6)</i>                                                                                                                                                                                                               |
| <i>At1g60280</i> | NAC023 (Arabidopsis NAC domain containing protein 23); transcription factor; similar to apical meristem formation protein-related                                                                                                                                                    |
| <i>At1g60290</i> | pseudogene, similar to chalcone-flavonone isomerase                                                                                                                                                                                                                                  |
| <i>At1g60300</i> | Apical meristem formation protein-related                                                                                                                                                                                                                                            |
| <i>At1g60310</i> | transposable element gene; non-LTR retrotransposon family (LINE)                                                                                                                                                                                                                     |
| <i>At1g60320</i> | toll-interleukin-resistance (TIR) domain-containing protein                                                                                                                                                                                                                          |
| <i>At1g60330</i> | pseudogene, similar to chalcone-flavonone isomerase                                                                                                                                                                                                                                  |
| <i>At1g60340</i> | NAC (No Apical Meristem) domain transcriptional regulator superfamily protein                                                                                                                                                                                                        |
| <i>At1g60350</i> | NAC024 (Arabidopsis NAC domain containing protein 24); transcription factor                                                                                                                                                                                                          |
| <i>At1g60360</i> | RING/U-box superfamily protein                                                                                                                                                                                                                                                       |
| <i>At1g60370</i> | F-box family protein                                                                                                                                                                                                                                                                 |
| <i>At1g60380</i> | NAC (No Apical Meristem) domain transcriptional regulator superfamily protein                                                                                                                                                                                                        |
| <i>At1g60390</i> | polygalacturonase 1 (PG1)                                                                                                                                                                                                                                                            |
| <i>At1g60400</i> | F-box/RNI-like superfamily protein                                                                                                                                                                                                                                                   |
| <i>At1g60410</i> | a paternally expressed imprinted gene                                                                                                                                                                                                                                                |
| <i>At1g60420</i> | <i>NUCLEOREDOXIN 1 (NRX1)</i> ; reduce transmission through pollen                                                                                                                                                                                                                   |

**Table S6: Sequence polymorphisms and their linkage disequilibrium (LD) in *BGLU6/At1g60270*.**

Positions of *BGLU6* CDS polymorphisms are given in "bp to start codon". Resulting amino acid changes of are indicated at the left. LD (expressed as  $R^2$  value) is classified in six classes ( $R^2 < 0.1$ ;  $0.1 < R^2 < 0.2$ ;  $0.2 < R^2 < 0.4$ ;  $0.4 < R^2 < 0.6$ ;  $0.6 < R^2 < 0.8$ ;  $0.8 < R^2$ ) that are shaded from light to dark grey. Minor alleles with allele frequency of 0.1% are excluded from the calculation. For each polymorphism, the allele frequency is counted. LD was calculated using Graphical Genotypes 2.0 (van Berloo *et al.* 2008). Allele frequencies in 504 *A. thaliana* natural accessions are given at the right.

| BGLU6 variant    | bp to Start codon | LD ( $R^2$ ) |     |     |     |     |     |     |     |     |     |     |     |     |     |      |      |      |      |      |      | allele frequency |      |      |      |      |      |      |      |      |      |             |      |                 |      |      |
|------------------|-------------------|--------------|-----|-----|-----|-----|-----|-----|-----|-----|-----|-----|-----|-----|-----|------|------|------|------|------|------|------------------|------|------|------|------|------|------|------|------|------|-------------|------|-----------------|------|------|
|                  |                   | 4            | 38  | 55  | 72  | 80  | 179 | 243 | 284 | 387 | 389 | 594 | 649 | 819 | 834 | 1032 | 1039 | 1047 | 1106 | 1138 | 1177 | 1284             | 1323 | 1326 | 1356 | 1407 | 1437 | 1462 | 1463 | 1510 | 1514 | Col0 allele | %    | non Col0 allele | %    |      |
| Glu/Lys          | 4                 |              | 0,0 | 0,3 | 0,8 | 0,9 | 0,8 | 0,7 | 0,0 | 0,6 | 0,7 | 0,7 | 0,1 | 0,2 | 0,1 | 0,1  | 0,5  | 0,5  | 0,0  | 0,2  | 0,1  | 0,0              | 0,3  | 0,3  | 0,0  | 0,3  | 0,3  | 0,4  | 0,3  | 0,3  | 0,2  | 468         | 92,9 | 36              | 7,1  |      |
| Silent (Ala/Ala) | 38                | 0,0          |     | 0,0 | 0,0 | 0,0 | 0,0 | 0,0 | 0,0 | 0,0 | 0,0 | 0,0 | 0,0 | 0,1 | 0,1 | 0,0  | 0,0  | 0,0  | 0,0  | 0,2  | 0,1  | 0,0              | 0,0  | 0,0  | 0,0  | 0,0  | 0,0  | 0,0  | 0,0  | 0,0  | 0,0  | 495         | 98,2 | 9               | 1,8  |      |
| Lys/Glu          | 55                | 0,3          | 0,0 |     | 0,0 | 0,4 | 0,4 | 0,0 | 0,0 | 0,0 | 0,0 | 0,2 | 0,0 | 0,1 | 0,1 | 0,0  | 0,0  | 0,3  | 0,0  | 0,1  | 0,1  | 0,0              | 0,1  | 0,8  | 0,0  | 0,5  | 0,5  | 0,3  | 0,0  | 0,3  | 0,3  | 497         | 98,6 | 7               | 1,4  |      |
| Silent (Phe/Phe) | 72                | 0,8          | 0,0 | 0,0 |     | 0,9 | 0,8 | 0,9 | 0,0 | 0,8 | 0,8 | 0,8 | 0,1 | 0,2 | 0,1 | 0,1  | 0,6  | 0,5  | 0,0  | 0,2  | 0,0  | 0,0              | 0,4  | 0,0  | 0,1  | 0,2  | 0,2  | 0,2  | 0,3  | 0,2  | 0,1  | 468         | 92,9 | 36              | 7,1  |      |
| Cys/Ser          | 80                | 0,9          | 0,0 | 0,4 | 0,9 |     | 1,0 | 0,8 | 0,0 | 0,7 | 0,7 | 0,8 | 0,1 | 0,2 | 0,2 | 0,1  | 0,6  | 0,6  | 0,0  | 0,2  | 0,1  | 0,0              | 0,4  | 0,3  | 0,1  | 0,4  | 0,4  | 0,3  | 0,3  | 0,3  | 0,2  | 458         | 90,9 | 45              | 8,9  |      |
| Arg/Thr          | 179               | 0,8          | 0,0 | 0,4 | 0,8 | 1,0 |     | 0,7 | 0,0 | 0,7 | 0,7 | 0,8 | 0,1 | 0,1 | 0,1 | 0,1  | 0,5  | 0,5  | 0,0  | 0,2  | 0,1  | 0,0              | 0,4  | 0,3  | 0,1  | 0,4  | 0,4  | 0,3  | 0,3  | 0,3  | 0,2  | 455         | 90,3 | 49              | 9,7  |      |
| Tyr/Tyr          | 243               | 0,7          | 0,0 | 0,0 | 0,9 | 0,8 | 0,7 |     | 0,0 | 0,9 | 0,9 | 0,9 | 0,1 | 0,2 | 0,2 | 0,1  | 0,7  | 0,5  | 0,0  | 0,2  | 0,1  | 0,0              | 0,5  | 0,0  | 0,1  | 0,2  | 0,2  | 0,2  | 0,3  | 0,2  | 0,1  | 466         | 92,5 | 38              | 7,5  |      |
| Ala/Gly          | 284               | 0,0          | 0,0 | 0,0 | 0,0 | 0,0 | 0,0 | 0,0 |     | 0,0 | 0,0 | 0,0 | 0,0 | 0,2 | 0,2 | 0,0  | 0,0  | 0,0  | 0,0  | 0,1  | 0,1  | 0,0              | 0,0  | 0,0  | 0,0  | 0,0  | 0,0  | 0,0  | 0,0  | 0,0  | 0,0  | 495         | 98,2 | 8               | 1,6  |      |
| Silent (Val/Val) | 387               | 0,6          | 0,0 | 0,0 | 0,8 | 0,7 | 0,7 | 0,9 | 0,0 |     | 1,0 | 0,8 | 0,1 | 0,1 | 0,1 | 0,1  | 0,7  | 0,4  | 0,0  | 0,2  | 0,1  | 0,0              | 0,5  | 0,0  | 0,1  | 0,2  | 0,2  | 0,2  | 0,3  | 0,2  | 0,1  | 472         | 93,7 | 31              | 6,2  |      |
| Asn/Ser          | 389               | 0,7          | 0,0 | 0,0 | 0,8 | 0,7 | 0,7 | 0,9 | 0,0 | 1,0 |     | 0,9 | 0,1 | 0,1 | 0,1 | 0,1  | 0,7  | 0,4  | 0,0  | 0,2  | 0,1  | 0,0              | 0,5  | 0,0  | 0,1  | 0,2  | 0,2  | 0,3  | 0,3  | 0,2  | 0,1  | 471         | 93,5 | 32              | 6,3  |      |
| Silent (Asp/Asp) | 594               | 0,7          | 0,0 | 0,2 | 0,8 | 0,8 | 0,8 | 0,9 | 0,0 | 0,8 | 0,9 |     | 0,1 | 0,2 | 0,2 | 0,1  | 0,7  | 0,5  | 0,0  | 0,2  | 0,1  | 0,0              | 0,5  | 0,1  | 0,1  | 0,2  | 0,2  | 0,2  | 0,2  | 0,1  | 0,0  | 463         | 91,9 | 41              | 8,1  |      |
| Leu/Phe          | 649               | 0,1          | 0,0 | 0,0 | 0,1 | 0,1 | 0,1 | 0,1 | 0,0 | 0,1 | 0,1 | 0,1 | 0,1 | 0,1 | 0,1 | 0,1  | 0,1  | 0,0  | 0,1  | 0,1  | 0,0  | 0,0              | 0,1  | 0,0  | 0,5  | 0,0  | 0,0  | 0,0  | 0,0  | 0,0  | 0,0  | 482         | 95,6 | 22              | 4,4  |      |
| Silent (Ala/Ala) | 819               | 0,2          | 0,1 | 0,1 | 0,2 | 0,2 | 0,1 | 0,2 | 0,2 | 0,1 | 0,1 | 0,2 | 0,1 | 0,1 | 0,1 | 0,1  | 1,0  | 0,1  | 0,1  | 0,1  | 0,1  | 0,1              | 0,3  | 0,5  | 0,1  | 0,2  | 0,1  | 0,0  | 0,1  | 0,1  | 0,1  | 0,1         | 389  | 77,2            | 115  | 22,8 |
| Silent (Asn/Asn) | 834               | 0,1          | 0,1 | 0,1 | 0,1 | 0,2 | 0,1 | 0,2 | 0,2 | 0,1 | 0,1 | 0,2 | 0,1 | 1,0 | 0,1 | 0,1  | 0,1  | 0,1  | 0,1  | 0,1  | 0,1  | 0,1              | 0,3  | 0,5  | 0,1  | 0,2  | 0,1  | 0,0  | 0,1  | 0,1  | 0,1  | 0,1         | 390  | 77,4            | 113  | 22,4 |
| Silent (Ser/Ser) | 1032              | 0,1          | 0,0 | 0,0 | 0,1 | 0,1 | 0,1 | 0,1 | 0,0 | 0,1 | 0,1 | 0,1 | 0,0 | 0,1 | 0,1 | 0,1  | 0,1  | 0,0  | 0,0  | 0,1  | 0,1  | 0,0              | 0,6  | 0,0  | 0,1  | 0,0  | 0,0  | 0,0  | 0,0  | 0,0  | 0,0  | 478         | 94,8 | 26              | 5,2  |      |
| Pro/Thr          | 1039              | 0,5          | 0,0 | 0,0 | 0,6 | 0,6 | 0,5 | 0,7 | 0,0 | 0,7 | 0,7 | 0,7 | 0,1 | 0,1 | 0,1 | 0,1  | 0,0  | 0,0  | 0,2  | 0,2  | 0,0  | 0,6              | 0,0  | 0,1  | 0,0  | 0,0  | 0,0  | 0,0  | 0,0  | 0,0  | 0,0  | 477         | 94,6 | 27              | 5,4  |      |
| Silent (Phe/Phe) | 1047              | 0,5          | 0,0 | 0,3 | 0,5 | 0,6 | 0,5 | 0,5 | 0,0 | 0,4 | 0,4 | 0,5 | 0,0 | 0,1 | 0,1 | 0,0  | 0,0  | 0,0  | 0,0  | 0,1  | 0,0  | 0,0              | 0,1  | 0,3  | 0,3  | 0,5  | 0,5  | 0,6  | 0,4  | 0,5  | 0,3  | 489         | 97,0 | 15              | 3,0  |      |
| Asn/Val          | 1106              | 0,0          | 0,0 | 0,0 | 0,0 | 0,0 | 0,0 | 0,0 | 0,0 | 0,0 | 0,0 | 0,0 | 0,0 | 0,1 | 0,1 | 0,0  | 0,0  | 0,0  | 0,1  | 0,1  | 0,0  | 0,1              | 0,0  | 0,0  | 0,0  | 0,0  | 0,0  | 0,0  | 0,0  | 0,0  | 0,0  | 493         | 97,8 | 11              | 2,2  |      |
| STOP/Glu         | 1138              | 0,2          | 0,2 | 0,1 | 0,2 | 0,2 | 0,2 | 0,2 | 0,1 | 0,2 | 0,2 | 0,2 | 0,1 | 0,3 | 0,3 | 0,1  | 0,2  | 0,1  | 0,1  | 0,1  | 0,1  | 0,1              | 0,2  | 0,1  | 0,1  | 0,1  | 0,1  | 0,1  | 0,1  | 0,1  | 0,1  | 145         | 28,8 | 359             | 71,2 |      |
| Val/Ile          | 1177              | 0,1          | 0,1 | 0,1 | 0,0 | 0,1 | 0,1 | 0,1 | 0,1 | 0,1 | 0,1 | 0,1 | 0,1 | 0,5 | 0,5 | 0,1  | 0,2  | 0,0  | 0,1  | 0,4  | 0,1  | 0,2              | 0,0  | 0,1  | 0,0  | 0,1  | 0,0  | 0,0  | 0,1  | 0,0  | 0,0  | 347         | 68,8 | 157             | 31,2 |      |
| Silent (Ile/Ile) | 1284              | 0,0          | 0,0 | 0,0 | 0,0 | 0,0 | 0,0 | 0,0 | 0,0 | 0,0 | 0,0 | 0,0 | 0,0 | 0,1 | 0,1 | 0,0  | 0,0  | 0,0  | 0,0  | 0,1  | 0,1  | 0,0              | 0,0  | 0,0  | 0,0  | 0,0  | 0,0  | 0,0  | 0,0  | 0,0  | 0,0  | 499         | 99,0 | 5               | 1,0  |      |
| Silent (Ser/Ser) | 1323              | 0,3          | 0,0 | 0,1 | 0,4 | 0,4 | 0,4 | 0,5 | 0,0 | 0,5 | 0,5 | 0,5 | 0,1 | 0,2 | 0,2 | 0,6  | 0,6  | 0,1  | 0,1  | 0,2  | 0,2  | 0,0              | 0,0  | 0,0  | 0,0  | 0,0  | 0,1  | 0,1  | 0,1  | 0,1  | 0,1  | 444         | 88,1 | 60              | 11,9 |      |
| Silent (Leu/Leu) | 1326              | 0,3          | 0,0 | 0,8 | 0,0 | 0,3 | 0,3 | 0,0 | 0,0 | 0,0 | 0,0 | 0,1 | 0,0 | 0,1 | 0,0 | 0,0  | 0,3  | 0,0  | 0,1  | 0,0  | 0,0  | 0,0              | 0,0  | 0,0  | 0,0  | 0,5  | 0,5  | 0,3  | 0,0  | 0,3  | 0,4  | 498         | 98,8 | 6               | 1,2  |      |
| Silent (Tyr/Tyr) | 1356              | 0,0          | 0,0 | 0,0 | 0,1 | 0,1 | 0,1 | 0,1 | 0,0 | 0,1 | 0,1 | 0,1 | 0,5 | 0,0 | 0,0 | 0,1  | 0,1  | 0,3  | 0,0  | 0,1  | 0,1  | 0,0              | 0,1  | 0,0  | 0,0  | 0,0  | 0,0  | 0,0  | 0,0  | 0,0  | 0,0  | 479         | 95,0 | 25              | 5,0  |      |
| Silent (Lys/Lys) | 1407              | 0,3          | 0,0 | 0,5 | 0,2 | 0,4 | 0,4 | 0,2 | 0,0 | 0,2 | 0,2 | 0,2 | 0,0 | 0,1 | 0,1 | 0,0  | 0,0  | 0,5  | 0,0  | 0,1  | 0,0  | 0,0              | 0,1  | 0,5  | 0,0  | 0,0  | 1,0  | 0,9  | 0,7  | 0,9  | 0,8  | 488         | 96,8 | 16              | 3,2  |      |
| Silent (Tyr/Tyr) | 1437              | 0,3          | 0,0 | 0,5 | 0,2 | 0,4 | 0,4 | 0,2 | 0,0 | 0,2 | 0,2 | 0,2 | 0,0 | 0,1 | 0,1 | 0,0  | 0,0  | 0,5  | 0,0  | 0,1  | 0,0  | 0,0              | 0,1  | 0,5  | 0,0  | 1,0  | 0,9  | 0,7  | 0,9  | 0,8  | 488  | 96,8        | 16   | 3,2             |      |      |
| Ala/Thr          | 1462              | 0,4          | 0,0 | 0,3 | 0,2 | 0,3 | 0,3 | 0,2 | 0,0 | 0,2 | 0,3 | 0,2 | 0,0 | 0,1 | 0,1 | 0,0  | 0,0  | 0,6  | 0,0  | 0,1  | 0,0  | 0,0              | 0,1  | 0,3  | 0,0  | 0,9  | 0,9  | 0,8  | 0,8  | 0,9  | 0,8  | 491         | 97,4 | 13              | 2,6  |      |
| Ala/Asp          | 1463              | 0,3          | 0,0 | 0,0 | 0,3 | 0,3 | 0,3 | 0,3 | 0,0 | 0,3 | 0,3 | 0,2 | 0,0 | 0,1 | 0,1 | 0,0  | 0,0  | 0,4  | 0,0  | 0,1  | 0,1  | 0,0              | 0,0  | 0,0  | 0,0  | 0,7  | 0,7  | 0,8  | 0,7  | 0,5  | 495  | 98,2        | 9    | 1,8             |      |      |
| Phe/Ser          | 1510              | 0,3          | 0,0 | 0,3 | 0,2 | 0,3 | 0,3 | 0,2 | 0,0 | 0,2 | 0,2 | 0,1 | 0,0 | 0,1 | 0,1 | 0,0  | 0,0  | 0,5  | 0,0  | 0,1  | 0,0  | 0,0              | 0,1  | 0,3  | 0,0  | 0,9  | 0,9  | 0,9  | 0,7  | 0,9  | 0,9  | 491         | 97,4 | 13              | 2,6  |      |
| Tyr/Ser          | 1514              | 0,2          | 0,0 | 0,3 | 0,1 | 0,2 | 0,2 | 0,1 | 0,0 | 0,1 | 0,1 | 0,0 | 0,0 | 0,1 | 0,1 | 0,0  | 0,0  | 0,3  | 0,0  | 0,1  | 0,0  | 0,0              | 0,1  | 0,4  | 0,0  | 0,8  | 0,8  | 0,8  | 0,5  | 0,9  | 0,9  | 494         | 98,0 | 10              | 2,0  |      |

**Table S7: List of 100 genes showing strongest co-expression with BGLU6.** The ATTED II database (Obayashi *et al.* 2007; version 7.1 from 17. August 2013; <http://atted.jp/>) was used to identify BGLU6 co-expressed genes. The strength of gene co expression is given by Mutual Rank (MR) which is calculated based on the rank of Pearson's correlation coefficient. Lower MR values indicate a stronger gene co expression. Reliability is scored from 0 to 3, with 3 indicating the highest reliability (only genes with reliability scores >0 are given). Genes with (putative) relation to phenylpropanoid biosynthesis pathway are marked in yellow.

| Rank | Locus     | Alias                     | (putative) Function                                                 | Reliability | MR all | MR (tissue) | MR (abiotic) | MR (biotic) | MR (hormone) | MR (light) |
|------|-----------|---------------------------|---------------------------------------------------------------------|-------------|--------|-------------|--------------|-------------|--------------|------------|
| 0    | At1g02070 | BGLU6                     | beta glucosidase 6                                                  |             | 0      | 0           | 0            | 0           | 0            | 0          |
| 1    | At4g34650 | SQS2                      | squalene synthase 2                                                 | 2           | 1      | 70          | 954.1        | 14.1        | 759.2        | 1027       |
| 2    | At5g44050 | MATE efflux               | MATE efflux family protein                                          | 1           | 6.6    | 63.8        | 295.6        | 47.5        | 58           | 6190       |
| 3    | At1g54040 | TASTY                     | epithiospecific protein                                             | 2           | 7.3    | 12224.2     | 2634.3       | 85.5        | 167.5        | 13312      |
| 4    | At2g40150 | TBL28                     | TRICHOME BIREFRINGENCE-LIKE 28                                      | 1           | 12.1   | 213.9       | 299.3        | 874.7       | 16917.2      | 88         |
| 5    | At4g01080 | TBL26                     | TRICHOME BIREFRINGENCE-LIKE 26                                      | 2           | 15.7   | 18534.6     | 6.2          | 53.9        | 95.5         | 11374      |
| 6    | At5g20070 | NUDX19                    | nudix hydrolase homolog 19                                          | 3           | 16.7   | 7045.4      | 12.2         | 759.3       | 6330.6       | 430.3      |
| 7    | At4g04750 | Major facilitator         | Major facilitator superfamily protein                               | 2           | 19.2   | 541.3       | 1343.4       | 9481.4      | 5312.9       | 224.2      |
| 8    | At3g51240 | TT6                       | flavanone 3-hydroxylase                                             | 3           | 20.7   | 12693.2     | 30.3         | 890.5       | 6631.2       | 456        |
| 9    | At4g13410 | CSLA15                    | Nucleotide-diphospho-sugar transferases superfamily protein         | 2           | 24     | 670.7       | 224.6        | 13.2        | 381.6        | 7791       |
| 10   | At5g17050 | UGT78D2                   | UDP-Glycosyl transferase 78D2                                       | 3           | 26.4   | 1706.6      | 18.3         | 3151.1      | 7877.7       | 396.5      |
| 11   | At1g06000 | UGT89C1                   | UDP-Glycosyltransferase superfamily protein                         | 1           | 27.4   | 6724.3      | 3.5          | 395.6       | 5223.1       | 311.3      |
| 12   | At5g52320 | CYP96A4                   | cytochrome P450, family 96, subfamily A, polypeptide 4              | 2           | 28.4   | 3519.2      | 101.9        | 53.4        | 16.2         | 3462       |
| 13   | At1g65060 | 4CL3                      | 4-coumarate:CoA ligase 3                                            | 3           | 29.3   | 9538.5      | 162.6        | 4980.1      | 10775.7      | 554.9      |
| 14   | At4g34610 | BLH6                      | BEL1-like homeodomain 6                                             | 2           | 29.5   | 603.9       | 67.8         | 4642.4      | 4014         | 237.9      |
| 15   | At3g48350 | CEP3                      | Cysteine proteinases superfamily protein                            | 2           | 31.8   | 8.1         | 4471.8       | 10028       | 50           | 1153       |
| 16   | At2g28550 | TOE1                      | related to AP2.7                                                    | 1           | 38.2   | 50.2        | 137.2        | 225.6       | 1091.7       | 428        |
| 17   | At1g52000 | Mannose-binding lectin    | Mannose-binding lectin superfamily protein                          | 3           | 38.4   | 1690.6      | 967.7        | 138.9       | 317.3        | 3441       |
| 18   | At5g11790 | NDL2                      | N-MYC downregulated-like 2                                          | 3           | 40     | 2493.7      | 9.4          | 120.1       | 1362.7       | 638.2      |
| 19   | At2g39250 | SNZ                       | Integrase-type DNA-binding superfamily protein                      | 1           | 40.8   | 934.4       | 419          | 521.8       | 1431.5       | 1073       |
| 20   | At2g27420 | Cysteineases              | Cysteine proteinases superfamily protein                            | 3           | 42.8   | 3182.2      | 478.7        | 6842.9      | 8520.6       | 55.2       |
| 21   | At2g38750 | ANNAT4                    | annexin 4                                                           | 1           | 47.9   | 645.4       | 215.9        | 17.6        | 133.5        | 2838       |
| 22   | At5g55120 | VTC5                      | galactose-1-phosphate guanylyltransferase (GDP)S:GDP-D-glucos       | 2           | 49.8   | 5423.1      | 97.3         | 467.7       | 344          | 423.1      |
| 23   | At5g60890 | MYB34                     | myb domain protein 34                                               | 1           | 50.1   | 20.1        | 655.3        | 109.5       | 57.8         | 2130       |
| 24   | At4g14090 | UGT75C1                   | UDP-Glycosyltransferase superfamily protein                         | 1           | 50.2   | 60.8        | 514.2        | 6696.8      | 3269.9       | 77.2       |
| 25   | At2g36590 | ProT3                     | proline transporter 3                                               | 1           | 52.9   | 14707.7     | 3.5          | 95          | 1202         | 238.3      |
| 26   | At5g05270 | isomerase                 | Chalcone-flavanone isomerase family protein                         | 3           | 53.1   | 10337.7     | 96.7         | 1088.8      | 7795.2       | 882.4      |
| 27   | At4g17470 | alpha/beta-Hydrolases     | alpha/beta-Hydrolases superfamily protein                           | 2           | 54.3   | 426         | 2367.6       | 950.1       | 123.5        | 2650       |
| 28   | At2g40460 | Major facilitator         | Major facilitator superfamily protein                               | 2           | 55.2   | 19776.4     | 164.5        | 82.7        | 195.9        | 809.1      |
| 29   | At2g23210 | bHLH34                    | basic helix-loop-helix (bHLH) DNA-binding superfamily protein       | 3           | 55.8   | 5440.3      | 39           | 7490        | 10504        | 1561       |
| 30   | At4g04840 | MSRB6                     | methionine sulfoxide reductase B6                                   | 1           | 57.8   | 914.5       | 3558.9       | 265.5       | 249.7        | 817.5      |
| 31   | At1g65860 | FMO GS-OX1                | flavin-monoxygenase glucosinolate S-oxygenase 1                     | 3           | 58.9   | 248.2       | 245.3        | 804.2       | 229.8        | 12653      |
| 32   | At4g15440 | HPL1                      | hydroperoxide lyase 1                                               | 3           | 61.1   | 14488.4     | 62.9         | 880.8       | 59           | 4825       |
| 33   | At4g36830 | GNS1                      | GNS1/SUR4 membrane protein family                                   | 1           | 62.1   | 10650.2     | 667.2        | 520.1       | 616.5        | 1409       |
| 34   | At1g78440 | GA2OX1                    | Arabidopsis thaliana gibberellin 2-oxidase 1                        | 2           | 62.1   | 8851        | 1392.3       | 725.1       | 5368         | 256.1      |
| 35   | At5g09870 | CESA5                     | cellulose synthase 5                                                | 3           | 64     | 2873.8      | 7.8          | 115.9       | 2265         | 1034       |
| 36   | At3g17130 | inhibitor                 | Plant invertase/pectin methylesterase inhibitor superfamily protein | 1           | 64.1   | 21492.4     | 663.7        | 1           | 4503.8       | 318.4      |
| 37   | At3g52370 | FLA15                     | FASCI-CLIN-like arabinogalactan protein 15 precursor                | 2           | 65.8   | 5037.6      | 44           | 178.2       | 4369.9       | 686.6      |
| 38   | At5g03760 | RAT4                      | Nucleotide-diphospho-sugar transferases superfamily protein         | 2           | 66.9   | 3339        | 79           | 296.5       | 271.2        | 568.1      |
| 39   | At3g27170 | CLC-B                     | chloride channel B                                                  | 3           | 67.8   | 1744.5      | 304.2        | 75.3        | 279.9        | 523.2      |
| 40   | At2g20340 | transferase               | Pyridoxal phosphate (PLP)-dependent transferases superfamily pr     | 2           | 68.1   | 6872.8      | 148.9        | 14.3        | 155.8        | 1486       |
| 41   | At1g48100 | Pectin lyase-like         | Pectin lyase-like superfamily protein                               | 1           | 69.7   | 19658.3     | 203.8        | 303         | 1989.6       | 4          |
| 42   | At5g42760 | transferase               | Leucine carboxyl methyltransferase                                  | 3           | 70.5   | 13350.9     | 131.9        | 4131.1      | 9880         | 7.3        |
| 43   | At2g32990 | GH9B8                     | glycosyl hydrolase 9B8                                              | 2           | 75.6   | 1764.5      | 28.3         | 33          | 1249.3       | 413.1      |
| 44   | At5g54060 | UGT79B1                   | UDP-glucose:flavonoid 3-o-glucosyltransferase                       | 1           | 76.7   | 204.5       | 213.9        | 5368.7      | 3267.4       | 44.2       |
| 45   | At4g12030 | BAT5                      | bile acid transporter 5                                             | 3           | 78.3   | 197.5       | 2751.1       | 7043.8      | 1695         | 19063      |
| 46   | At1g24070 | CSLA10                    | cellulose synthase-like A10                                         | 3           | 78.7   | 12197.1     | 948.7        | 200.5       | 224.3        | 8726       |
| 47   | At5g67150 | transferase               | HXXD-type acyl-transferase family protein                           | 2           | 82.2   | 1180.8      | 2041.2       | 1493.5      | 267.4        | 7278       |
| 48   | At3g29590 | 5MAT                      | HXXD-type acyl-transferase family protein                           | 2           | 83.4   | 104.2       | 796.5        | 8064.9      | 1692.7       | 202.7      |
| 49   | At3g03190 | GSTF11                    | glutathione S-transferase F11                                       | 3           | 86.7   | 50.4        | 2941.4       | 661.2       | 634.5        | 15767      |
| 50   | At5g17220 | TT19                      | glutathione S-transferase phi 12                                    | 2           | 87.3   | 3606.2      | 241.3        | 5895.3      | 8143.8       | 112.5      |
| 51   | At3g54990 | SMZ                       | Integrase-type DNA-binding superfamily protein                      | 1           | 93.9   | 396.9       | 143.1        | 7256.9      | 613.9        | 587        |
| 52   | At1g72500 |                           |                                                                     | 1           | 96     | 967         | 3672.5       | 427.4       | 373.4        | 5.5        |
| 53   | At3g02830 | ZFN1                      | zinc finger protein 1                                               | 2           | 97.4   | 7856.2      | 82.3         | 5628.6      | 5975         | 82.2       |
| 54   | At1g10370 | GSTU17                    | Glutathione S-transferase family protein                            | 2           | 99.4   | 13288       | 248.8        | 978.5       | 6504.1       | 281.2      |
| 55   | At2g24540 | AFR                       | Galactose oxidase/kelch repeat superfamily protein                  | 3           | 100.4  | 9733        | 277.1        | 698.3       | 6403.6       | 319.9      |
| 56   | At1g60590 | Pectin lyase-like         | Pectin lyase-like superfamily protein                               | 2           | 100.6  | 3737.4      | 1563.6       | 12575       | 3357.3       | 31.8       |
| 57   | At1g62560 | FMO GS-OX3                | flavin-monoxygenase glucosinolate S-oxygenase 3                     | 3           | 102.4  | 320.9       | 105.7        | 9100        | 841.3        | 9354       |
| 58   | At1g56670 | hydrolase                 | GDLS-like Lipase/Acylhydrolase superfamily protein                  | 1           | 102.5  | 7018.7      | 97.9         | 307.4       | 13911.9      | 14770      |
| 59   | At1g56650 | SIAA1                     | production of anthocyanin pigment 1                                 | 2           | 105    | 6939.7      | 917.2        | 4975.3      | 3863         | 93.9       |
| 60   | At5g48880 | PKT2                      | peroxisomal 3-keto-acyl-CoA thiolase 2                              | 3           | 105    | 16028       | 453.2        | 114.5       | 5855.1       | 467.2      |
| 61   | At2g31790 | transferase               | UDP-Glycosyltransferase superfamily protein                         | 1           | 105.7  | 246.6       | 2861.1       | 9707.7      | 1845.8       | 718        |
| 62   | At3g55120 | TT5                       | Chalcone-flavanone isomerase family protein                         | 3           | 106.2  | 10646.8     | 116          | 7559.5      | 16061.6      | 844.1      |
| 63   | At3g17120 |                           |                                                                     | 1           | 108.1  | 1601.8      | 582.2        | 1.4         | 75.5         | 8599       |
| 64   | At1g12370 | UVR2                      | photolyase 1                                                        | 3           | 109    | 11825.3     | 107.4        | 777.5       | 8856.5       | 77.7       |
| 65   | At4g16140 | proline-rich              | proline-rich family protein                                         | 1           | 109.3  | 5324.8      | 354.8        | 19.9        | 75.3         | 2499       |
| 66   | At3g21890 | zinc finger               | B-box type zinc finger family protein                               | 3           | 112.2  | 20047.8     | 114          | 323.2       | 4446.3       | 877.5      |
| 67   | At1g62540 | FMO GS-OX2                | flavin-monoxygenase glucosinolate S-oxygenase 2                     | 1           | 113.7  | 2406.3      | 697          | 7577.3      | 6970.7       | 3147       |
| 68   | At5g20220 | CCHC-type                 | zinc knuckle (CCHC-type) family protein                             | 2           | 114.1  | 4437.2      | 194.9        | 1287.3      | 7729.2       | 9.4        |
| 69   | At5g07690 | PMG2                      | myb domain protein 29                                               | 3           | 114.6  | 90.5        | 2338.4       | 5955.7      | 302.5        | 9462       |
| 70   | At3g15790 | MBD11                     | methyl-CPG-binding domain 11                                        | 1           | 115    | 16011.9     | 282.7        | 33.6        | 231.6        | 2341       |
| 71   | At5g44110 | POP1                      | P-loop containing nucleoside triphosphate hydrolases superfamily    | 3           | 120.4  | 6435.1      | 68.1         | 738.2       | 8124         | 1330       |
| 72   | At4g10390 | kinase                    | Protein kinase superfamily protein                                  | 2           | 120.8  | 1044.1      | 80.5         | 254.2       | 153.6        | 1205       |
| 73   | At2g36870 | XTH32                     | xyloglucan endotransglucosylase/hydrolase 32                        | 2           | 121.7  | 786.1       | 100          | 1971.5      | 7736.1       | 171.2      |
| 74   | At5g08640 | FLS1                      | flavonol synthase 1                                                 | 3           | 122.3  | 13380.9     | 56.2         | 3519.2      | 11252.1      | 1909       |
| 75   | At5g42800 | TT3                       | dihydroflavonol 4-reductase                                         | 2           | 127.3  | 2252.4      | 56.3         | 6585.4      | 5948.9       | 858.1      |
| 76   | At2g38760 | ANNAT3                    | annexin 3                                                           | 1           | 128.5  | 5235.7      | 482          | 299.5       | 83.4         | 3218       |
| 77   | At2g44940 | DNA-binding               | Integrase-type DNA-binding superfamily protein                      | 2           | 130.1  | 2813.7      | 303.1        | 675.1       | 170.4        | 58.7       |
| 78   | At3g17609 | HYH                       | HY5-homolog                                                         | 3           | 130.7  | 1172.2      | 67.3         | 10089       | 19576.3      | 147.8      |
| 79   | At5g48850 | SDI1                      | Tetratricopeptide repeat (TPR)-like superfamily protein             | 3           | 131.2  | 12641.2     | 7583.5       | 166.5       | 6120.2       | 18438      |
| 80   | At2g34490 | CYP710A2                  | cytochrome P450, family 710, subfamily A, polypeptide 2             | 1           | 132.7  | 1760.7      | 242.3        | 6374.7      | 15333.8      | 2281       |
| 81   | At3g21560 | UGT84A2                   | UDP-Glycosyltransferase superfamily protein                         | 2           | 134.2  | 7499.8      | 138.6        | 17644       | 14278        | 376.5      |
| 82   | At3g61220 | SDR1                      | NAD(P)-binding Rossmann-fold superfamily protein                    | 2           | 134.4  | 7295.4      | 81.2         | 11473       | 12301        | 79.8       |
| 83   | At2g39330 | JAL23                     | jacalin-related lectin 23                                           | 3           | 134.5  | 10683.4     | 366.6        | 1061.9      | 1317.9       | 6965       |
| 84   | At2g19780 | LRR                       | Leucine-rich repeat (LRR) family protein                            | 2           | 135.3  | 3752.2      | 766.4        | 28.1        | 22.4         | 18945      |
| 85   | At5g15740 | transferase               | O-fucosyltransferase family protein                                 | 2           | 136.7  | 14428.2     | 33.8         | 212.7       | 19701.9      | 29.4       |
| 86   | At2g29450 | GSTU5                     | glutathione S-transferase tau 5                                     | 2           | 138.3  | 10420.4     | 2775.5       | 137.7       | 70.2         | 988.5      |
| 87   | At2g25530 | ATPase                    | AFG1-like ATPase family protein                                     | 3           | 139    | 18789.3     | 85.5         | 1865.9      | 10607.6      | 204.9      |
| 88   | At1g30530 | UGT78D1                   | UDP-Glycosyl transferase 78D1                                       | 3           | 141.3  | 7848.2      | 40           | 4825.3      | 3810.4       | 27.4       |
| 89   | At1g19670 | COR11                     | chlorophyllase 1                                                    | 2           | 144    | 3943.9      | 1065.5       | 500.8       | 134.8        | 60.8       |
| 90   | At5g61810 | APC1                      | Mitochondrial substrate carrier family protein                      | 2           | 145.3  | 8057.8      | 3375.4       | 23.5        | 42.4         | 634        |
| 91   | At1g32900 | GBSS1                     | UDP-Glycosyltransferase superfamily protein                         | 3           | 146.7  | 10197.4     | 1244.7       | 282.8       | 15899.7      | 193.5      |
| 92   | At3g52740 |                           |                                                                     | 3           | 147    | 10795.9     | 23.8         | 405.5       | 12786.9      | 68.2       |
| 93   | At5g23820 | MD-2-related lipid recogn | MD-2-related lipid recognition domain-containing protein            | 3           | 149.7  | 6           | 2006.9       | 1260.4      | 1003.8       | 4380       |
| 94   | At3g57020 | phosphotriesterase        | Calcium-dependent phosphotriesterase superfamily protein            | 1           | 152.3  | 3456.3      | 545.9        | 898.8       | 2890.8       | 805.5      |
| 95   | At5g62220 | GT18                      | glycosyltransferase 18                                              | 2           | 152.4  | 6784.5      | 19           |             |              |            |



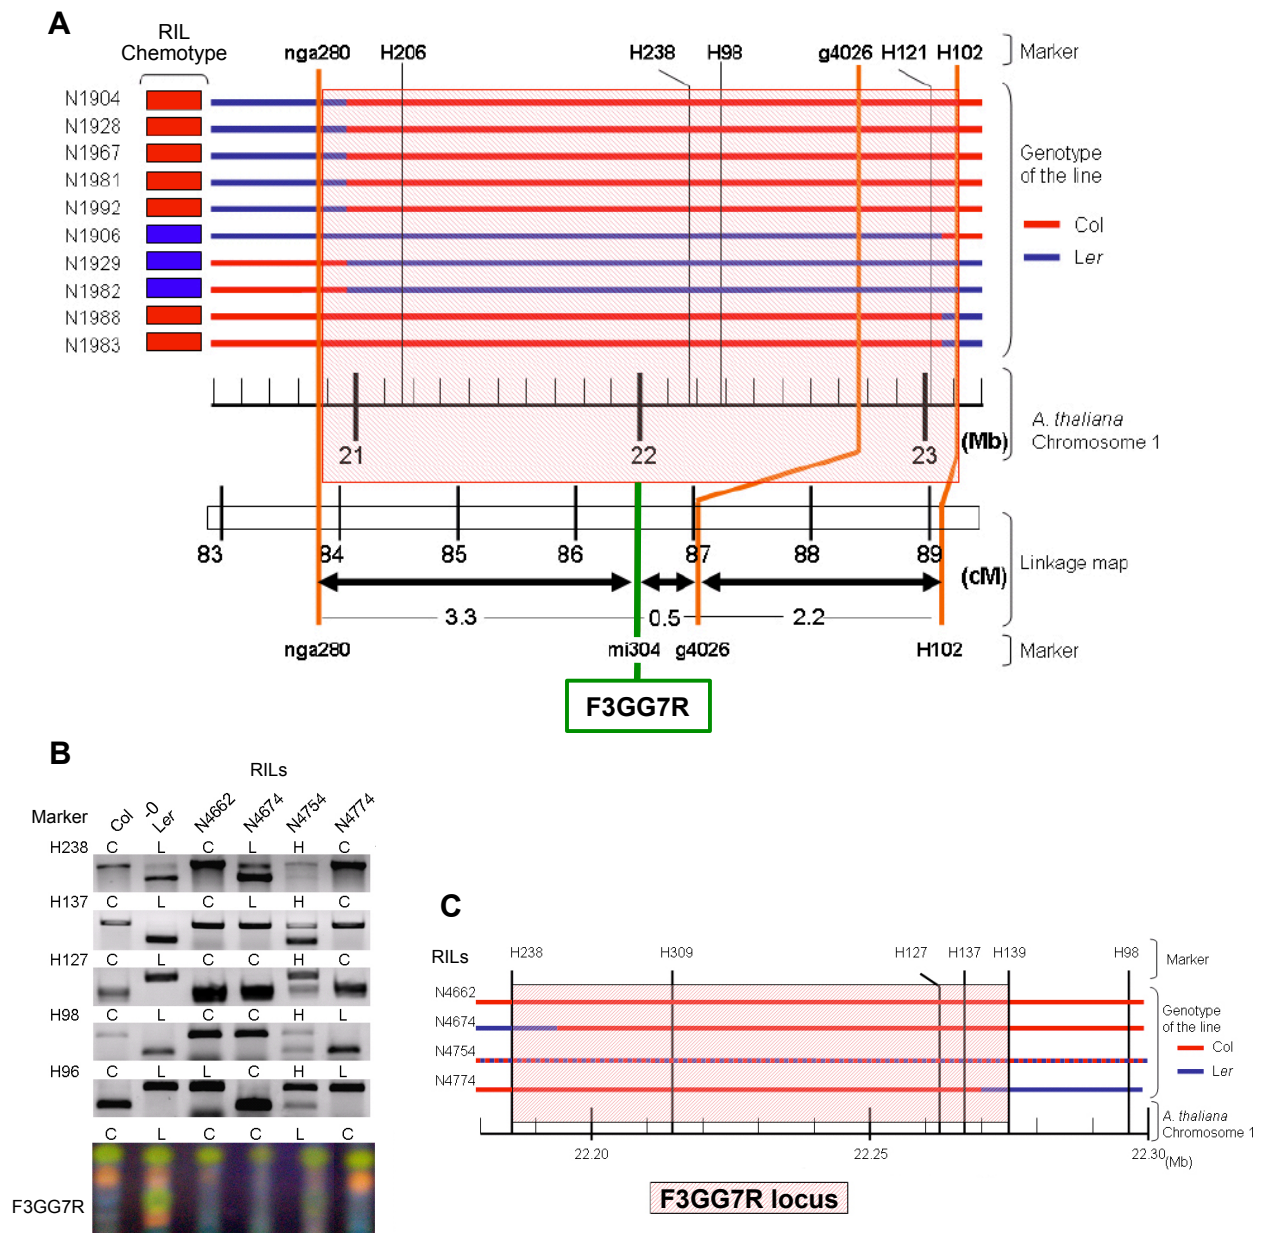

**Figure S1: Fine-mapping of the F3GG7R locus on chromosome 1.**

(A) The linkage map of the F3GG7R locus area, constructed using the MAPMAKER program, was integrated to the physical map of *A. thaliana* chromosome 1 by anchor markers H102, g4026 and nga280. Chemotypes of the RILs are listed next to line names as Col-0 (red box) and Ler (blue box). The genotypes of the RILs at the marker positions are indicated with red (Col-0) or blue (Ler) solid lines. The position of the F3GG7R locus is indicated with a green vertical line at 86.52 cM. The genetic distance (in cM) between the markers and the F3GG7R locus are given below the arrows.

(B) Geno- and phenotypical analysis of selected RILs containing recombination events between the flanking markers H96 and H238. Selected RILs were analysed using CAPS markers and F3GG7R chemotype marker. Genotype key: Col-0 (C), Ler (L), heterozygous (H).

(C) F3GG7R locus on *A. thaliana* chromosome 1 between the sequence-based map markers H238 (22.18 Mb) and H139 (22.27 Mb).

-1335 **AC-rich element**

Col-0 ATTTCCACCAACATTCCACCGACATATCTCTCTCGCGGGAAAGGGCATTFTTAAAAACATTT -1276  
Ws-0 ATTTCCACCAACATTCCACCGACATATCTCTCTCGCGGGAAAGGGCATTFTTAAAAACATTT  
Ct-1 ATTTCCACCAACATTCCACCGACATATCTCTCTCGCGGGAAAGGGCATTFTTAAAAACATTT  
Nd-1 ATTTCCACCAACATTCCACCGACATATCTCTCTCGCGGGAAAGGGCATTFTTAAAAACATTT  
Cvi ATTTCCACCAACATTCCACCGACATATCTCTCTCGCGGGAAAGGGCATTFTTAAATACATTT  
#Nö-0 ATTTCCACCAACATTCCACCGACATATCTCTCTCGCGGGAAAGGGCATTFTTAAAAACATTT  
#Oy-0 ATTTCCACCAACATTCCACCGACATATCTCTCTCGCGGGAAAGGGCATTFTTAAAAACATTT  
#C24 ATTTCCACCAACATTCCACCGACATATCTCTCTCGCGGGAAAGGGCATTFTTAAAAACATTT  
#Bur-0 ATTTCCACCAACATTCCACCGACATATCTCTCTCGCGGGAAAGGGCATTFTTAAAAACATTT  
#Ler ATTTCCACCAACATTCCACCGACATATCTCTCTCGCGGGAAAGGGCATTFTTAAAAACATTT

Col-0 AGCAATTTAGGAGCGATGCTCAATATTTATTTATTTTTTTTTTTTATTTTTTTTTTGGATGTAA -1216  
Ws-0 AGCAATTTAGGAGCGATGCTCAATATTTATTTATTTTTTTTTTTTATTTTTTTT-GGATGTAA  
Ct-1 AGCAATTTAGGAGCGATGCTCAATATTTATTTATTTTTTTTTTTTATTTTTTTTTTGGATGTAA  
Nd-1 AGCAATTTAGGAGCGATGCTCAATATTTATTTATTTTTTTTTTTTATTTTTTTTTTGGATGTAA  
Cvi AGCAATTTAGGAGCGATGCTCAATATTTATTTATTTATTTATTTATTTTTTTTTTGGATGTAA  
#Nö-0 AGCAATTTAGGAGCGATGCTCAATATTTATTTATTTATTTATTTATTTTTTTTTTGGATGTAA  
#Oy-0 AGCAATTTAGGAGCGATGCTCAATATTTATTTATTTATTTATTTATTTTTTTTTTGGATGTAA  
#C24 AGCAATTTAGGAGCGATGCTCAATATTTATTTATTTATTTATTTATTTTTTTTTTGGATGTAA  
#Bur-0 AGCAATTTAGGAGCGATGCTCAATATTTATTTATTTATTTATTTATTTTTTTTTTGGATGTAA  
#Ler AGCAATTTAGGAGCGATGCTCAATATTTATTTATTTATTTATTTATTTTTTTTTTGGATGTAA

**MYB core element**

Col-0 ATTTCAAATATAACACAATAACGGTACTATCATAAATTACTAGCTTACCTATCTGAATTTT -1156  
Ws-0 ATTTCAAATATAACACAATAACGGTACTATCATAAATTACTAGCTTACCTATCTGAATTTT  
Ct-1 ATTTCAAATATAACACAATAACGGTACTATCATAAATTACTAGCTTACCTATCTGAATTTT  
Nd-1 ATTTCAAATATAACACAATAACGGTACTATCATAAATTACTAGCTTACCTATCTGAATTTT  
Cvi ATTTCAAATATAACACAATAACGGTACTATCATAAATTACTAGCTTACCTATCTGAATTTT  
#Nö-0 ATTTCAAATATAACACAATAACGGTACTATCATAAATTACTAGCTTACCTATCTGAATTTT  
#Oy-0 ATTTCAAATATAACACAATAACGGTACTATCATAAATTACTAGCTTACCTATCTGAATTTT  
#C24 ATTTCAAATATAACACAATAACGGTACTATCATAAATTACTAGCTTACCTATCTGAATTTT  
#Bur-0 ATTTCAAATATAACACAATAACGGTACTATCATAAATTACTAGCTTACCTATCTGAATTTT  
#Ler ATTTCAAATATAACACAATAACGGTACTATCATAAATTACTAGCTTACCTATCTGAATTTT

Col-0 CATTTTGTTATTTATAAATATAAATGGTATTTTATTATATGATATCAAACCTAAAAATATCT -1096  
Ws-0 CATTTTGTTATTTATAAATATAAATGGTATTTTATTATATGATATCAAACCTAAAAATATCT  
Ct-1 CATTTTGTTATTTATAAATATAAATGGTATTTTATTATATGATATCAAACCTAAAAATATCT  
Nd-1 CATTTTGTTATTTATAAATATAAATGGTATTTTATTATATGATATCAAACCTAAAAATATCT  
Cvi CATTTTGTTGATTTATAAATATAAATGGTATTTTATTATATGATATCAAACCTAAAAATATCT  
#Nö-0 CATTTTGTTATTTATAAATATAAATGGTATTTTATTATATGATATCAAACCTAAAAATATCT  
#Oy-0 CATTTTGTTATTTATAAATATAAATGGTATTTTATTATATGATATCAAACCTAAAAATATCT  
#C24 CATTTTGTTATTTATAAATATAAATGGTATTTTATTATATGATATCAAACCTAAAAATATCT  
#Bur-0 CATTTTGTTATTTATAAATATAAATGGTATTTTATTATATGATATCAAACCTAAAAATATCT  
#Ler CATTTTGTTGATTTATAAATATAAATGGTATTTTATTATATGATATCAAACCTAAAAATATCT

Col-0 AAATAAATATGATTTCTCATAATTTATTTAATCTAAAAATGCGTATGGAAATAACACAAA -1036  
Ws-0 AAATAAATATGATTTCTCATAATTTATTTAATCTAAAAATGCGTATGGAAATAACACAAA  
Ct-1 AAATAAATATGATTTCTCATAATTTATTTAATCTAAAAATGCGTATGGAAATAACACAAA  
Nd-1 AAATAAATATGATTTCTCATAATTTATTTAATCTAAAAATGCGTATGGAAATAACACAAA  
Cvi AAATAAATATGATTTCTCATAATTTATTTAATCTAAAAATGCGTATGGAAATAACACAAA  
#Nö-0 AAATAAATATGATTTCTCATAATTTATTTAATCTAAAAATGCGTATGGAAATAACACAAA  
#Oy-0 AAATAAATATGATTTCTCATAATTTATTTAATCTAAAAATGCGTATGGAAATAACACAAA  
#C24 AAATAAATATGATTTCTCATAATTTATTTAATCTAAAAATGCGTATGGAAATAACACAAA  
#Bur-0 AAATAAATATGATTTCTCATAATTTATTTAATCTAAAAATGCGTATGGAAATAACACAAA  
#Ler AAATAAATATGATTTCTCATAATTTATTTAATCTAAAAATGCGTATGGAAATAACACAAA

Col-0 ATTTGTTTGGATAAGATATCATCTTTTTGTCAACAAATTATATTAGTTCTAGTAAAAATA -976  
Ws-0 ATTTGTTTGGATAAGATATCATCTTTTTGTCAACAAATTATATTAGTTCTAGTAAAAATA  
Ct-1 ATTTGTTTGGATAAGATATCATCTTTTTGTCAACAAATTATATTAGTTCTAGTAAAAATA  
Nd-1 ATTTGTTTGGATAAGATATCATCTTTTTGTCAACAAATTATATTAGTTCTAGTAAAAATA  
Cvi ATTTGTTTGGATAAGATATCATCTTTTTGTCAACAAATTATATTAGTTCTAGTAAAAATA  
#Nö-0 ATTTGTTTGGATAAGATATCATCTTTTTGTCAACAAATTATATTAGTTCTAGTAAAAATA  
#Oy-0 ATTTGTTTGGATAAGATATCATCTTTTTGTCAACAAATTATATTAGTTCTAGTAAAAATA  
#C24 ATTTGTTTGGATAAGATATCATCTTTTTGTCAACAAATTATATTAGTTCTAGTAAAAATA  
#Bur-0 ATTTGTTTGGATAAGATATCATCTTTTTGTCAACAAATTATATTAGTTCTAGTAAAAATA  
#Ler ATTTGTTTGGATAAGATATCATCTTTTTGTCAACAAATTATATTAGTTCTAGTAAAAATA

Col-0 TATATAACTAATACTCTAAACGATTCAAAAAATTCAAACCCAAAATAGTAGAACCTGAAAA -916  
Ws-0 TATATAACTAATACTCTAAACGATTCAAAAAATTCAAACCCAAAATAGTAGAACCTGAAAA  
Ct-1 TATATAACTAATACTCTAAACGATTCAAAAAATTCAAACCCAAAATAGTAGAACCTGAAAA  
Nd-1 TATATAACTAATACTCTAAACGATTCAAAAAATTCAAACCCAAAATAGTAGAACCTGAAAA  
Cvi TATATAACTAATACTCTAAACGATTCAAAAAATTCAAACCCAAAATAGTAGAACCTGAAAA  
#Nö-0 TATATAACTAATACTCTAAACGATTCAAAAAATTCAAACCCAAAATAGTAGAACCTGAAAA  
#Oy-0 TATATAACTAATACTCTAAACGATTCAAAAAATTCAAACCCAAAATAGTAGAACCTGAAAA  
#C24 TATATAACTAATACTCTAAACGATTCAAAAAATTCAAACCCAAAATAGTAGAACCTGAAAA  
#Bur-0 TATATAACTAATACTCTAAACGATTCAAAAAATTCAAACCCAAAATAGTAGAACCTGAAAA  
#Ler CATGTAATACTAATACTCTAAACGATTCAAAAAATTCAAACCCAAAATAGTAGAACCTGAAAA

AC-rich element

Col-0 AATAATATCATGGTGCTAATTTATCCATTTTAAAGTATGGAAAATACGTGAAAAGTGAGG -856  
Ws-0 AATAATATCATGGTGCTAATTTATCCATTTTAAAGTATGGAAAATACGTGAAAAGTGAGG  
Ct-1 AATAATATCATGGTGCTAATTTATCCATTTTAAAGTATGGAAAATACGTGAAAAGTGAGG  
Nd-1 AATAATATCATGGTGCTAATTTATCCATTTTAAAGTATGGAAAATACGTGAAAAGTGAGG  
Cvi AATAATATCATGGTGCTAATTTATCCATTTTAAAGTATGGAAAATACGTGAAAAGTGAGG  
#Nö-0 AATAATATCATGGTGCTAATTTATCCATTTTAAAGTATGGAAAATACGTGAAAAGTGAGG  
#Oy-0 AATAATATCATGGTGCTAATTTATCCATTTTAAAGTATGGAAAATACGTGAAAAGTGAGG  
#C24 AATAATATCATGGTGCTAATTTATCCATTTTAAAGTATGGAAAATACGTGAAAAGTGAGG  
#Bur-0 AATAATATCATGGTGCTAATTTATCCATTTTAAAGTATGGAAAATACGTGAAAAGTGAGG  
#Ler AATAATATCATGGTGCTAATTTATCCATTTTAAAGTATGGAAAATACGTGAAAAGTGAGG

Col-0 AAACAAGAACTCCTAAATATTTTCGAAATCATCCAAGATTCCAAGTGTGTTGAGAAAGC -796  
Ws-0 AAACAAGAACTCCTAAATATTTTCGAAATCATCCAAGATTCCAAGTGTGTTGAGAAAGC  
Ct-1 AAACAAGAACTCCTAAATATTTTCGAAATCATCCAAGATTCCAAGTGTGTTGAGAAAGC  
Nd-1 AAACAAGAACTCCTAAATATTTTCGAAATCATCCAAGATTCCAAGTGTGTTGAGAAAGC  
Cvi AAACAAGAACTCCTAAATATTTTCGAAATCATCCAAGATTCCAAGTGTGTTGAGAAAGC  
#Nö-0 AAACAAGAACTCCTAAATATTTTCGAAATCATCCAAGATTCCAAGTGTGTTGAGAAAGC  
#Oy-0 AAACAAGAACTCCTAAATATTTTCGAAATCATCCAAGATTCCAAGTGTGTTGAGAAAGC  
#C24 AAACAAGAACTCCTAAATATTTTCGAAATCATCCAAGATTCCAAGTGTGTTGAGAAAGC  
#Bur-0 AAACAAGAACTCCTAAATATTTTCGAAATCATCCAAGATTCCAAGTGTGTTGAGAAAGC  
#Ler AAACAAGAACTCCTAAATATTTTCGAAATCATCCAAGATTCCAAGTGTGTTGAGAAAGC

Col-0 AAGTAGCTAGTTCACAGCCTGAGAGCCAATCCAAATTTTTTTTTTTTTTTTTTTGAACAAC -736  
Ws-0 AAGTAGCTAGTTCACAGCCTGAGAGCCAATCCAAATTTTTTTTTTTTTTTTTTTGAACAAC  
Ct-1 AAGTAGCTAGTTCACAGCCTGAGAGCCAATCCAAATTTTTTTTTTTTTTTTTTTGAACAAC  
Nd-1 AAGTAGCTAGTTCACAGCCTGAGAGCCAATCCAAATTTTTTTTTTTTTTTTTTTGAACAAC  
Cvi AACTAGCTAGTTCACAGCCTGAGAGCCAATCCAAGTTTCTTACTTCATATTCTGAACAAC  
#Nö-0 AAGTAGCTAGTTCACAGCCTGAGAGCCAATCCAAATTTTTTTTTTTTTTTTTTTGAACAAC  
#Oy-0 AAGTAGCTAGTTCACAGCCTGAGAGCCAATCCAAATTTTTTTTTTTTTTTTTTTGAACAAC  
#C24 AAGTAGCTAGTTCACAGCCTGAGAGCCAATCCAAGTTTCTTACTTCATATTCTGAACAAC  
#Bur-0 AACTAGCTAGTTCACAGCCTGAGAGCCAATCCAAATTTTTTTTTTTTTTTTTTTGAACAAC  
#Ler AACTAGCTAGTTCACAGCCTGAGAGCCAATCCAAATTTTTTTTTTTTTTTTTTTGAACAAC

Col-0 ATAGCCAATCCAAATTC AAGTTCAATTTATAACTTATATATGGAGCTGACCAATTTGAGT -676  
Ws-0 ATAGCCAATCCAAATTC AAGTTCAATTTATAACTTATATATGGAGCTGACCAATTTGAGT  
Ct-1 ATAGCCAATCCAAATTC AAGTTCAATTTATAACTTATATATGGAGCTGACCAATTTGAGT  
Nd-1 ATAGCCAATCCAAATTC AAGTTCAATTTATAACTTATATATGGAGCTGACCACTTTGAGT  
Cvi ATAGCCAATCCAAATTC AAGTTCAATTTATAACTTATATATGGAGCTGACCAATTTGAGT  
#Nö-0 ATAGCCAATCTAAATTC AAGTTCAATTTATAACTTATATATGGAGCTGACCACTTTGAGT  
#Oy-0 ATAGCCAATCCAAATTC AAGTTCAATTTATAACTTATATATGGAGCTGACCAATTTGAGT  
#C24 ATAGCCAATCCAAATTC AAGTTCAATTTATAACTTATATATGGAGCTGACCAATTTGAGT  
#Bur-0 ATAGCCAATCCAAATTC AAGTTCAATTTATAACTTATATATGGAGCTGCCCAATTTGAGT  
#Ler ATAGCAATCCAAATTC AAGTTCAATTTATAACTTATATATGGAGCTGCCCAATTTGAGT

Col-0 CTTGGATTAATCCAAAGGTTCCAAATTTTTTTTTCTTTTTTACAAATCTATATATATGGTC -616  
Ws-0 CTTGGATTAATCCAAAGGTTCCAAATTTTTTTTTCTTTTTTACAAATCTATATATATGGTC  
Ct-1 CTTGGATTAATCCAAAGGTTCCAAATTTTTTTTTCTTTTTTACAAATCTATATATATGGTC  
Nd-1 CTTGGATTAATCCAAAGGTTCTAAATTTTTTTTTCTTTTTTACAAATCTATATATATGGTC  
Cvi CTTGGATTAATCCAAAGGTTCCAAATTTTTTTTTCTTTTTTACAAATCTATATATATGGTC  
#Nö-0 CTTGGATTAATCCAAAGGTTCTAAATTTTTTTTTCTTTTTTACAAATCTATATATATGGTC  
#Oy-0 CTTGGATTAATCCAAAGGTTCCAAATTTTTTTTTCTTTTTTACAAATCTATATATATGGTC  
#C24 CTTGGATTAATCCAAAGGTTCCAAATTTTTTTTTCTTTTTTACAAATCTATATATATGGTC  
#Bur-0 CTTGGATTAATCCAAAGGTTCCAAATTTTTTTTTCTTTTTTACAAATCTATATATATGGTC  
#Ler CTTGGATTAATCCAAAGGTTCCAAATTTTTTTTTCTTTTTTACAAATCTATATATATGGTC

Col-0 TTCATTACAAATTTACATTACGTATTCCAATTTCTGCGGATAGATTTTTTCTTACTTCAT -556  
Ws-0 TTCATTACAAATTTACATTACGTATTCCAATTTCTGCGGATAGATTTTTTCTTACTTCAT  
Ct-1 TTCATTACAAATTTACATTACGTATTCCAATTTCTGCGGATAGATTTTTTCTTACTTCAT  
Nd-1 TTCATTACAAATTTACATTACGTATTCCAATTTCTGCGGATAGATTTTTTCTTACTTCAT  
Cvi TTCATTACAAATTTACATTACGTATTCCAATTTCTGCGGATAGATTTTTTCTTACTTCAT  
#Nö-0 TTCATTACAAATTTACATTACGTATTCTAATTTCTGCGGATAGATTTTTTCTTACTTCAT  
#Oy-0 TTCATTACAAATTTACATTACGTATTCCAATTTCTGCGGATAGATTTTTTCTTACTTTAT  
#C24 TTCATTACAAATTTACATTACGTATTCCAATTTCTGCGGATAGATTTTTTCTTACTTCAT  
#Bur-0 TTCATTACAAATTTACATTACGTATTCCAATTTCTGCGGATATTATTTTTTCTTACTTCAT  
#Ler TTCATTACAAATTTACATTACGTATTCCAATTTCTGCGGATAGATTTTTTCTTACTTCAT

Col-0 ACAGAACTAAATCTAAGACCATCTCCATTGGTAGTCTCTCAAGAGAGTTTCTCACTACTA -496  
Ws-0 ACAGAACTAAATCTAAGACCATCTCCATTGGTAGTCTCTCAAGAGAGTTTCTCACTACTA  
Ct-1 ACAGAACTAAATCTAAGACCATCTCCATTGGTAGTCTCTCAAGAGAGTTTNTCACTACTA  
Nd-1 ACAGAACTAAATCTAAGACCATCTCCATTGGTAGTCTCTCAAGAGAGTTTCTCACTACTA  
Cvi ACAGAACTAAATCTAAGACCATCTCCATTGGTAGTCTCTCAAGAGAGTTTCTCACTACTA  
#Nö-0 ACAGAACTAAATCTAAGATCATCTCCATTG-TAGTCTCTCA-GAGAGTTTCTCA-TA-TA  
#Oy-0 ACAGAACTAAATCTAAGACCATCTCCATTGGTAGTCTCTCAAGAGAGTTTCTCACTACTA  
#C24 ACAGAACTAAATCTAAGACCATCTCCATTGGTAGTCTCTCAAGAGAGTTTCTCACTACTA  
#Bur-0 ACAGAACTAAATCTAAGACCATCTCCATTGGTAGTCTCTCAAGAGAGTTTCTCACTACTA  
#Ler ACAGAACTAAATCTAAGACCATCTCCATTGGTAGTCTCTCAAGAGAGTTTCTCACTACTA

Col-0 AAATAATAAAAATAATAAAAAGAGAAGAGAGAGAGTATAGAAAAGTTTCTCAAGTGAGAAA -436  
Ws-0 AAATAATAAAAATAATAAAAAGAGAAGAGAGAGAGTATAGAAAAGTTTCTCAAGTGAGAAA  
Ct-1 AAATAATAAAAATAATAAAAAGAGAAYAGAGAGAGTATAYAAAAGTTTCTCAAGTGAGAAA  
Nd-1 AAATAATAAAAATAATAAAAAGAGAAGAAAGAGAGGTGTAGAAAAGTTTCTCAAGCGAGAAA  
Cvi AAATAATAAAAATAATAAAAAGAGAAGAGAGAGAGTATAGAAAAGTTTCTCAAGTGAGAAA  
#Nö-0 AAATAATAAAAATAATAAAAAGAGAAGAGAGAGAGT--AGAAAAGTTTCTCAAGTGAGAAA  
#Oy-0 AAATAATAAAAATAATAAAAAGAGAAGAGAGAGAGTGTAGAAAAGTTTCTCAAGTGAGAAA  
#C24 AAATAATAAAAATAATAAAAAGAGAAGAGAGAGAGTATAGAAAAGTTTCTCAAGTGAGAAA  
#Bur-0 AAATAATAAAAATAATAAAAAGAGAAGAGAGAGAGTATAGAAAAGTTTCTCAAGTGAGAAA  
#Ler AAATAATAAAAATAATAAAAAGAGAAGAGAGAGAGTATAGAAAAGTTTCTCAAGTGAGAAA

Col-0 CTATGAGATATTCTCTACAAGCCATCATTACATTTCTCTCCTCTCAATTGGTTCAATTTT -376  
Ws-0 CTATGAGATATTCTCTACAAGCCATCATTACATTTCTCTCCTCTCAATTGGTTCAATTTT  
Ct-1 CTATGAGATATTCTCTACAAGCCATCATTACATTTCTCTCCTCTCAATTGGTTCAATTTT  
Nd-1 CTATGAGATACTCTCTACAAGCCATCATTACATTTCTCTCCTCTCAATTAGTTCAATTTT  
Cvi CTATGAGATATTCTCTACAAGCCATCATTACATTTCTCTCCTCTCAATTGGTTCAATTTT  
#Nö-0 CTATGAGATATTCTCTACAAGCCATCATTACATTTCTCTCCTCTCAATTGGTTCAATTTT  
#Oy-0 CTATGAGATACTCTCTACAAGCTATCATTACATTTCTCTCCTCTCAATTGGTTCAATTTT  
#C24 CTATGAGATATTCTCTACAAGCCATCATTACATTTCTCTCCTCTCAATTGGTTCAATTTT  
#Bur-0 CTATGAGATATTCTCTACAAGCCATCATTACATTTCTCTCCTCTCAATTGGTTCAATTTT  
#Ler CTATGAGATATTCTCTACAAGCCATCATTACATTTCTCTCCTCTCAATTGGTTCAATTTT

Col-0 TTCATTTAAAATAAAAAATTTAATCATATAATAAAAAATTTAGTAAAATACTAATTTGTTTGT -316  
Ws-0 TTCATTTAAAATAAAAAATTTAATCATATAATAAAAAATTTAGTAAAATACTAATTTGTTTGT  
Ct-1 TTCATTTAAAATAAAAAATTTAATCATATAATAAAAAATTTAGTAAAATACTAATTTGTTTGT  
Nd-1 TTCATTTAAAATAAAAAATTTAATCATATAATAAAAAATTTAGTAAAATACTAATTTGTTTGT  
Cvi TTCATTTAAAATAAAAAATTTAATCATATAATAAAAAATTTAGTAAAATACTAATTTGTTTGT  
#Nö-0 TTCATTTAAAATAAAAAATTTAATCATATAATAAAAAATTTAGTAAAATACTAATTTGTTTGT  
#Oy-0 TTCATTTAAAATAAAAAATTTAATCATATAATAAAAAATTTAGTAAAATACTAATTTGTTTGT  
#C24 TTCATTTAAAATAAAAAATTTAATCATATAATAAAAAATTTAGTAAAATACTAATTTGTTTGT  
#Bur-0 TTCATTTAAAATAAAAAATTTAATCATATAATAAAAAATTTAGTAAAATACTAATTTGTTTGT  
#Ler TTCATTTAAAATAAAAAATTTAATCATATAATAAAAAATTTAGTAAAATACTAATTTGTTTGT

Col-0 TTGAAAAACTTTTGGGTTTCTCCTTGATGGAGATGCCCAAAGATATTTTTTACACTTCA -256  
Ws-0 TTGAAAAACTTTTGGGTTTCTCCTTGATGGAGATGCCCAAAGATATTTTTTACACTTCA  
Ct-1 TTGAAAAACTTTTGGGTTTCTCCTTGATGGAGATGCCCAAAGATATTTTTTACACTTCA  
Nd-1 TTGAAAAACTTTTGGGTTTCTCCTTGATGGAGATGCCCAAAGATATTTTTTACACTTCA  
Cvi TTGAAAAACTTTTGGGTTTCTCCTTGATGGAGATGCCCAAAGATATTTTTTACACTTCA  
#Nö-0 TTGAAAAACTTTTGGGTTTCTCCTTGATGGAGATGCCCAAAGATATTTTTTACACTTCA  
#Oy-0 TTGAAAAACTTTTGGGTTTCTCCTTGATGGAGATGCCCAAAGATATTTTTTACACTTCA  
#C24 TTGAAAAACTTTTGGGTTTCTCCTTGATGGAGATGCCCAAAGATATTTTTTACACTTCA  
#Bur-0 TTGAAAAACTTTTGGGTTTCTCCTTGATGGAGATGCCCAAAGATATTTTTTACACTTCA  
#Ler TTGAAAAACTTTTGGGTTTCTCCTTGATGGAGATGCCCAAAGATATTTTTTACACTTCA

Col-0 TATAGTACTAATTACTAAATCTAGGATAATATATTTTTTCAAACCCCAAAACAAAAATGGA -196  
Ws-0 TATAGTACTAATTACTAAATCTAGGATAATATATTTTTTCAAACCCCAAAACAAAAATGGA  
Ct-1 TATAGTACTAATTACTAAATCTAGGATAATATATTTTTTCAAACCCCAAAACAAAAATGGA  
Nd-1 TATAGTACTAATTACTAAATCTAGGATAATATATTTTTTCAAACCCCAAAACAAAAATGGA  
Cvi TATAGTACTAATTACTAAATCTAGGATAATATATTTTTTCAAACCCCAAAACAAAAATGGA  
#Nö-0 TATAGTACTAATTACTAAATCTAGGATAATATATTTTTTCAAACCCCAAAACAAAAATGGA  
#Oy-0 TATAGTACTAATTACTAAATCTAGGATAATATATTTTTTCAAACCCCAAAACAAAAATGGA  
#C24 TATAGTACTAATTACTAAATCTAGGATAATATATTTTTTCAAACCCCAAAACAAAAATGGA  
#Bur-0 TATAGTACTAATTACTAAATCTAGGATAATATATTTTTTCAAACCCCAAAACAAAAATGGA  
#Ler TATAGTACTAATTACTAAATCTAGGATAATATATTTTTTCAAACCCCAAAACAAAAATGGA

Col-0 TAGTAGTACACTACTATGCATATTTGATATTTCTATTTGTGGGAAGCGTAATATTCATTT -136  
Ws-0 TAGTAGTACACTACTATGCATATTTGATATTTCTATTTGTGGGAAGCGTAATATTCATTT  
Ct-1 TAGTAGTACACTACTATGCATATTTGATATTTCTATTTGTGGGAAGCGTAATATTCATTT  
Nd-1 TAGTAGTACACTACTATGCATATTTGATATTTCTATTTGTGGGAAGCGTAATATTCATTT  
Cvi TAGTAGTACACTACTATGCATATTTGATATTTCTATTTGTGGGAAGCGTAATATTCATTT  
#Nö-0 TAGTAGTACACTACTATGCATATTTGATATTTCTATTTGTGGGAAGCGTAATATTCATTT  
#Oy-0 TAGTAGTACACTACTATGCATATTTGATATTTCTATTTGTGGGAAGCGTAATATTCATTT  
#C24 TAGTAGTACACTACTATGCATATTTGATATTTCTATTTGTGGGAAGCGTAATATTCATTT  
#Bur-0 TAGTAGTACACTACTATGCATATTTGATATTTCTATTTGTGGGAAGCGTAATATTCATTT  
#Ler TAGTAGTACACTACTATGCATATTTGATATTTCTATTTGTGGGAAGCGTAATATTCATTT

|        |                                                             |     |
|--------|-------------------------------------------------------------|-----|
| Col-0  | CAACACGTGGTAATTCAAAGTGGACCATCTTTCTTTTTCATCCTCACAGAAATAACACT | -76 |
| Ws-0   | CAACACGTGGTAATTCAAAGTGGACCATCTTTCTTTTTCATCCTCACAGAAATAACACT |     |
| Ct-1   | CAACACGTGGTAATTCAAAGTGGACCATCTTTCTTTTTCATCCTCACAGAAATAACACT |     |
| Nd-1   | CAACACGTGGTAATTCAAAGTGGACCATCTTTCTTTTTCATCCTCACAGAAATAACACT |     |
| Cvi    | CAACACGTGGTAATTCAAAGTGGACCATCTTTCTTTTTCATCCTCACAGAAATAACACT |     |
| #Nö-0  | CAACACGTGGTAATTCAAAGTGGACCATCTTTCTTTTTCATCCTCACAGAAATAACACT |     |
| #Oy-0  | CAACACGTGGTAATTCAAAGTGGACCATCTTTCTTTTTCATCCTCACAGAAATAACACT |     |
| #C24   | CAACACGTGGTAATTCAAAGTGGACCATCTTTCTTTTTCATCCTCACAGAAATAACACT |     |
| #Bur-0 | CAACACGTGGTAATTCAAAGTGGACCATCTTTCTTTTTCATCCTCACAGAAATAACACT |     |
| #Ler   | CAACACGTGGTAATTCAAAGTGGACCATCTTTCTTTTTCATCCTCACAGAAATAACACT |     |

  

|        |                                                             |                 |  |
|--------|-------------------------------------------------------------|-----------------|--|
|        |                                                             | <b>TATA-box</b> |  |
| Col-0  | GGAGGGCAGGTGGTACAGTGAGCGAGAGACTCGTAATTTATTAATTCTAAGTTCTGACA | -16             |  |
| Ws-0   | GGAGGGCAGGTGGTACAGTGAGCGAGAGACTCGTAATTTATTAATTCTAAGTTCTGACA |                 |  |
| Ct-1   | GGAGGGCAGGTGGTACAGTGAGCGAGAGACTCGTAATTTATTAATTCTAAGTTCTGACA |                 |  |
| Nd-1   | GGAGGGCAGGTGGTACAGTGAGCGAGAGACTCGTAATTTATTAATTCTAAGTTCTGACA |                 |  |
| Cvi    | GGAGGGCAGGTGGTACAGTGAGCGAGAGACTCGTAATTTATTAATTCTAAGTTCTGACA |                 |  |
| #Nö-0  | GGAGGGCAGGTGGTACAGTGAGCGAGAGACTCGTAATTTATTAATTCTAAGTTCTGACA |                 |  |
| #Oy-0  | GGAGGGCAGGTGGTACAGTGAGCGAGAGACTCGTAATTTATTAATTCTAAGTTCTGACA |                 |  |
| #C24   | GGAGGGCAGGTGGTACAGTGAGCGAGAGACTCGTAATTTATTAATTCTAAGTTCTGACA |                 |  |
| #Bur-0 | GGAGGGCAGGTGGTACAGTGAGCGAGAGACTCGTAATTTATTAATTCTAAGTTCTGACA |                 |  |
| #Ler   | GGAGGGCAGGTGGTACAGTGAGCGAGAGACTCGTAATTTATTAATTCTAAGTTCTGACA |                 |  |

  

|        |                                                              |     |
|--------|--------------------------------------------------------------|-----|
| Col-0  | AGCCAATAATGGAACGAAAAGAGAGAAAAAGTGTGAAAAAATGGAAAAGACTTTTGCTCT | +45 |
| Ws-0   | AGCCAATAATGGAACGAAAAGAGAGAAAAAGTGTGAAAAAATGGAAAAGACTTTTGCTCT |     |
| Ct-1   | AGCCAATAATGGAACGAAAAGAGAGAAAAAGTGTGAAAAAATGGAAAAGACTTTTGCTCT |     |
| Nd-1   | AGCCAATAATGGAACGAAAAGAGAGAAAAAGTGTGAAAAAATGGAAAAGACTTTTGCTCT |     |
| Cvi    | AGCCAATAATGGAACGAAAAGAGAGAAAAAGTGTGAAAAAATGGAAAAGACTTTTGCTCT |     |
| #Nö-0  | AGCCAATAATGGAACGAAAAGAGAGAAAAAGTGTGAAAAAATGGAAAAGACTTTTGCTCT |     |
| #Oy-0  | AGCCAATAATGGAACGAAAAGAGAGAAAAAGTGTGAAAAAATGGAAAAGACTTTTGCTCT |     |
| #C24   | AGCCAATAATGGAACGAAAAGAGAGAAAAAGTGTGAAAAAATGGAAAAGACTTTTGCTCT |     |
| #Bur-0 | AGCCAATAATGGAACGAAAAGAGAGAAAAAGTGTGAAAAAATGGAAAAGACTTTTGCTCT |     |
| #Ler   | AGCCAATAATGGAACGAAAAGAGAGAAAAAGTGTGAAAAAATGGAAAAGACTTTTGCTCT |     |

**Figure S2: *BGLU6* promoter, alignment and putative MYB binding sites.**

CLUSTALW multiple sequence alignment of *BGLU6* promoters from ten naturally *A. thaliana* accessions. Nucleotides that differs from the consensus sequence are highlighted in gray. F3GG7R-accumulating accessions are marked with #. Transcribed sequences are given in bold letters and underlined letters indicate coding sequences. Putative MYB binding sites are boxed in blue. MYB core element: CNGTTR, AC-rich element: MCCWAM, MYB related element 1 (MRE1): AMCWAMC. MYB binding sites corresponding to MYBPZM: CCWACC and MYBPLANT: MACCWAMC are not found in the *proBGLU6*.

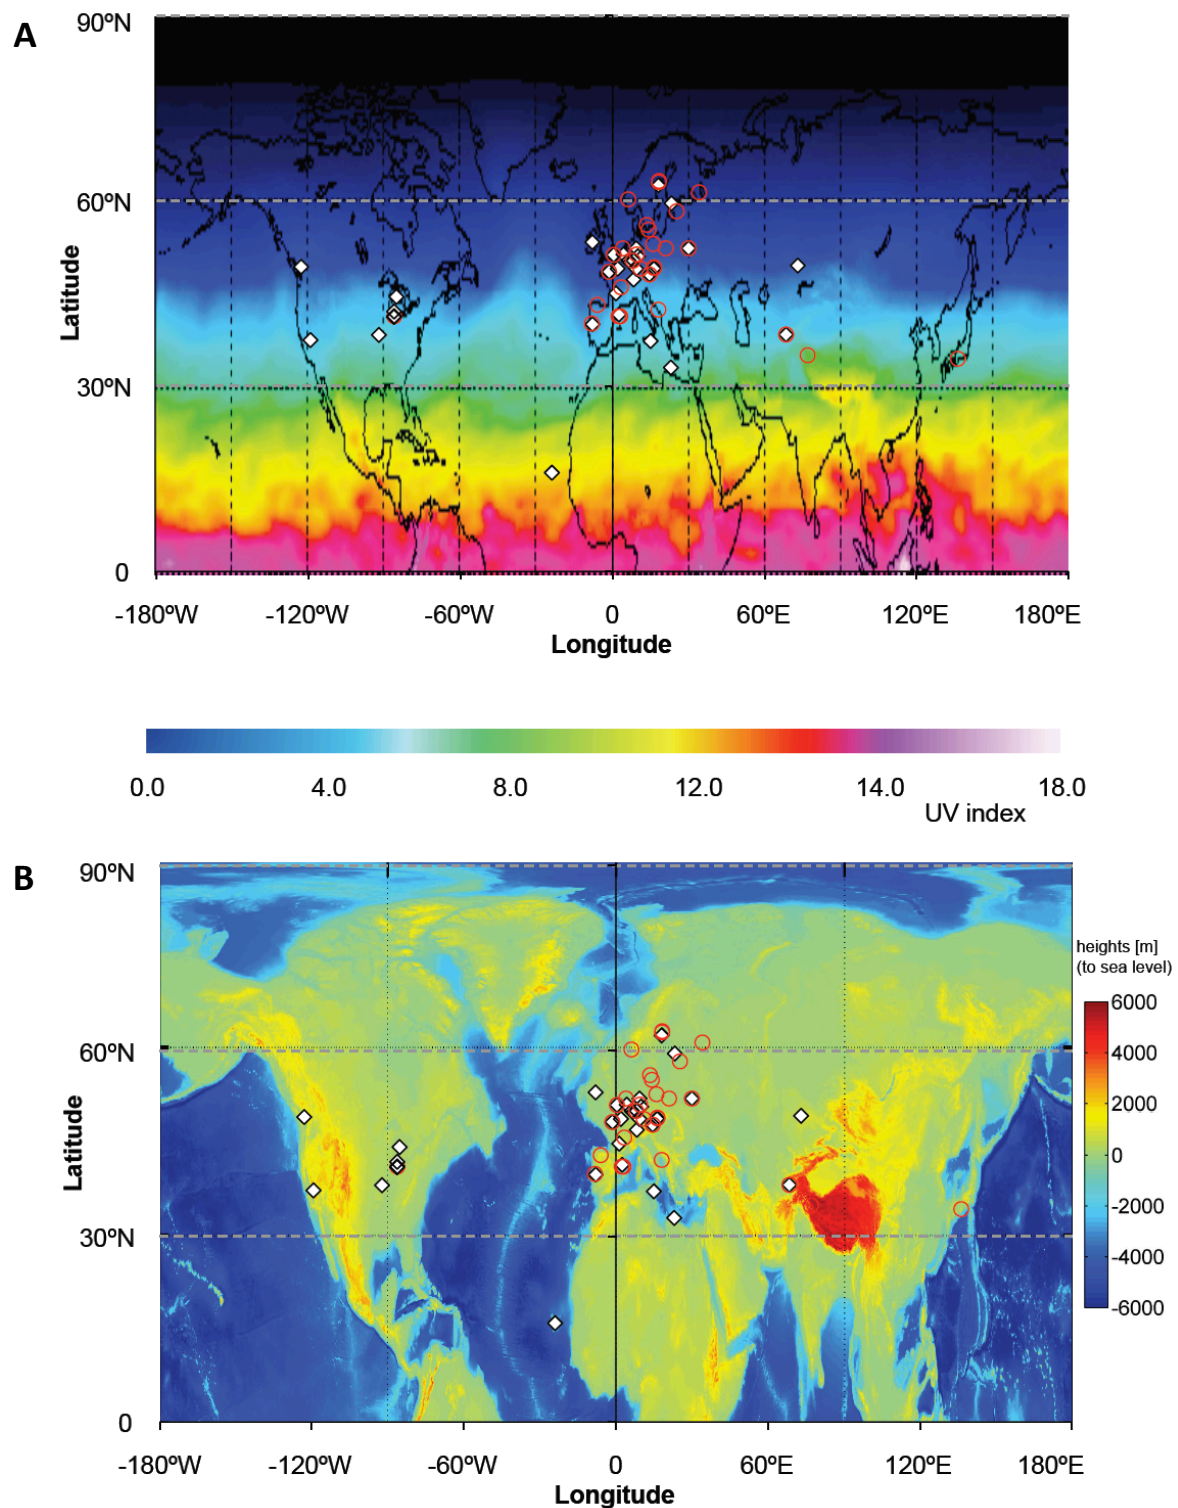

**Figure S3: Correlation analyses of F3GG7R-production with environmental factors at accession collection places.**

Geographical distribution of the collection places of the *A. thaliana* Nordborg accessions in the northern hemisphere. Red circles indicate accessions which produce F3GG7R, white diamonds indicate non-producer accessions. The accession distribution map was overlaid with (A) an UV-index map (clear-sky UV index map of 12 of October 2000; <http://www.temis.nl/uvradiation/info/figs/uvi20001012.gif>) to indicate the level of UV radiation at the collection places and (B) with a topographic map (<https://geodesy.curtin.edu.au/research/models/Earth2012/>) indicating the altitude at the collection places.







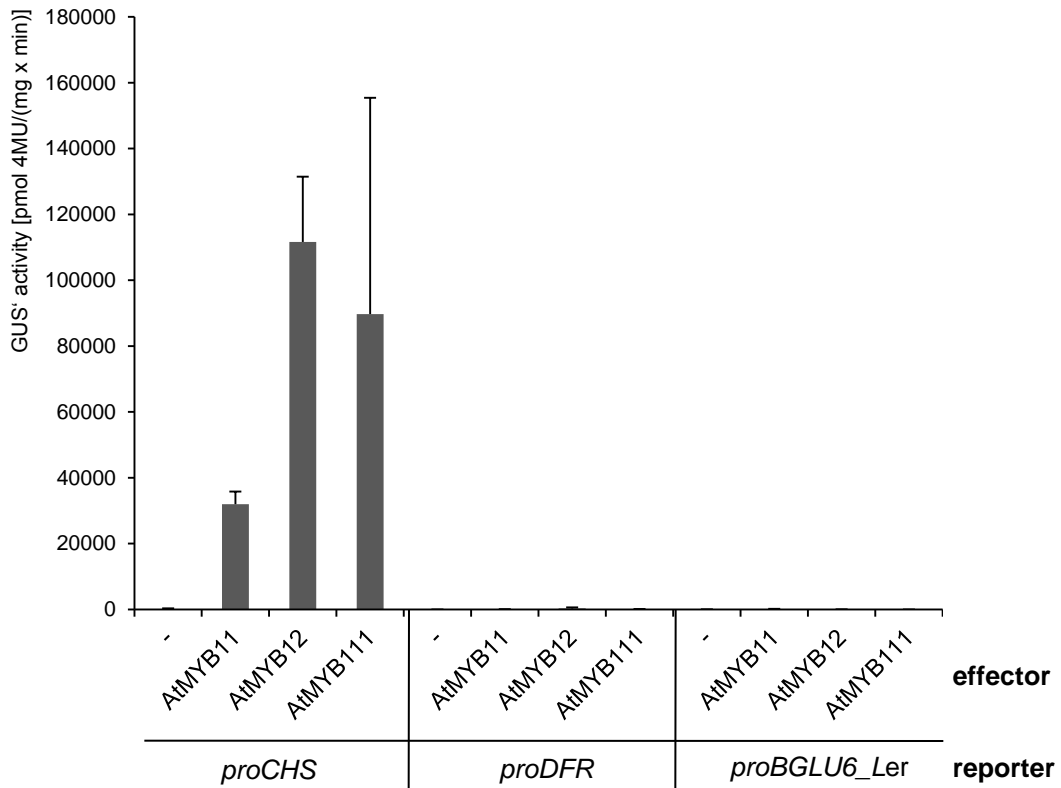

**Figure S5: Co-transfection analysis of target gene specificities in *A. thaliana* At7 protoplasts.**

Results from co-transfection experiments in *A. thaliana* protoplasts. The data shown are from two independent biological replicates. Promoter fragments of the *CHS* (positive control), *DFR* (negative control) and *BGLU6* genes (reporters, fused to GUS) were assayed for their responsiveness to the 35S-driven effectors MYB11, MYB111 and MYB12, respectively. The reporter constructs for *proCHS* and *proDFR* are as described in Mehrtens *et al.* (2005). From genomic *A. thaliana* Ler DNA a 1455 bp *BGLU6* promoter fragment was amplified using the primers RS1247 5'-GGG ACA AGT TTG TAC AAA AAA GCA GGC TTC GAA TAA ACC AAA TGA AGA AAG ACG TG-3' (containing Gateway attB1) and RS1289 5'-GGG GAC CAC TTT GTA CAA GAA AGC TGG GTC CAT GGT TTC ACA CTT TTT CTC TCT TTT CG-3' (containing Gateway attB2) and via Entry clone inserted into the Gateway-compatible vector pDISCO, resulting in a fusion to the *uidA/GUS*-ORF. Protoplast isolation and transfection experiments for the detection of transient expression were performed as described by Mehrtens *et al.* (2005). In the co-transfection experiments, a total of 25  $\mu$ g of pre-mixed plasmid DNA was transfected, consisting of 10  $\mu$ g of reporter plasmid, 10  $\mu$ g of effector plasmid and 5 mg of the luciferase (LUC) transfection control and standardisation plasmid (*4xproUBI:LUC*). Protoplasts were incubated for 20 h at 26° C in the dark before LUC and GUS enzyme activities were measured. Specific GUS activity is given in pmol 4-MU per  $\mu$ g protein per min. Standardised specific GUS activity (GUS') was calculated by multiplication of the specific GUS activity value with a correction factor derived from the ratio of the specific LUC activity in the given sample to the mean specific LUC activity (describing the transformation efficiency). The figure shows GUS' activity resulting from the influence of tested effector proteins on different reporters.
